# Supplementary material for: Structural Relationships in the Lysozyme Superfamily: Significant Evidence for Glycoside Hydrolase Signature Motifs
Source: PubMed Central journal article supplement (PMC2976769; doi:10.1371/journal.pone.0015388), 2010-11-09
Supplement: pone.0015388.s001.pdf [file pone.0015388.s001.pdf]

**Table T1. List of the 32 X-ray structures used in this study.**

| GH family | PDB code | res <sup>a</sup>         | source                             |
|-----------|----------|--------------------------|------------------------------------|
| GH19      | 3cql     | 1.50                     | <i>Carica papaya</i>               |
|           | 2baa     | 1.80                     | <i>Hordeum vulgare</i>             |
|           | 2dkv     | 2.00                     | <i>Oryza sativa</i>                |
|           | 1qxj     | 1.80                     | <i>Jack bean</i>                   |
|           | 1z37     | 1.53                     | <i>Brassica juncea</i>             |
|           | 2cjl     | 1.50                     | <i>Streptomyces coelicolor</i>     |
|           | 1wvv     | 2.00                     | <i>Streptomyces griseus</i>        |
|           | 3hbe     | 1.55                     | <i>Picea abies</i>                 |
| GH22c     | 1iee     | 0.94                     | <i>Gallus gallus</i>               |
|           | 2ihl     | 1.40                     | <i>Coturnix coturnix jap</i>       |
|           | 135l     | 1.30                     | <i>Meleagris gallopavo</i>         |
|           | 1hhl     | 1.90                     | <i>Numida meleagris</i>            |
|           | 1ghl     | 2.10                     | <i>Phasianus colchicus</i>         |
|           | 2gv0     | 1.90                     | <i>Pelodiscus sinensis</i>         |
|           | 1lmq     | 1.60                     | <i>Oncorhynchus mykiss</i>         |
|           | 1lzs     | 1.60                     | <i>Homo sapiens</i>                |
|           | 2z2f     | 1.50                     | <i>Bos taurus</i>                  |
|           | 1qqy     | 1.85                     | <i>Canis familiaris</i>            |
|           | 2goi     | 2.30                     | <i>Mus musculus</i>                |
|           | 2fbd     | 1.90                     | <i>Musca domestica</i>             |
|           | 1jug     | 1.90                     | <i>Tachyglossus aculeatus</i>      |
|           | 2eql     | 2.50                     | <i>Equus caballus</i>              |
| 1iiz      | 2.40     | <i>Antheraea mylitta</i> |                                    |
| 3cb7      | 1.90     | <i>Musca domestica</i>   |                                    |
| GH22i     | 2dqa     | 1.60                     | <i>Tapes japonica</i>              |
| GH23      | 153l     | 1.60                     | <i>Anser anser anser</i>           |
|           | 3gxr     | 1.70                     | <i>Gadus morhua</i>                |
| GH24v     | 2lzm     | 1.70                     | <i>Enterobacteria phage T4</i>     |
|           | 2anx     | 1.04                     | <i>Enterobacteria phage p22</i>    |
| GH24l     | 1am7     | 2.30                     | <i>Enterobacteria phage lambda</i> |
| GH46      | 1qgi     | 1.60                     | <i>Bacillus circulans</i>          |
|           | 1chk     | 2.40                     | <i>Streptomyces sp. n174</i>       |

<sup>a</sup> x-ray solution
