# Supplementary material for: Structural Relationships in the Lysozyme Superfamily: Significant Evidence for Glycoside Hydrolase Signature Motifs
Source: PubMed Central journal article supplement (PMC2976769; doi:10.1371/journal.pone.0015388), 2010-11-09
Supplement: pone.0015388.s002.pdf [file pone.0015388.s002.pdf]

Figure S1. Multiple alignment of GH19 motif sequences.

|    |        | 10                  |                   |
|----|--------|---------------------|-------------------|
|    |        | ...   ...   ...   . |                   |
| tr | C7PAL6 | C7PAL6_CHIPD        | YHGRGPIQLSWNNYNG  |
| tr | A4CA61 | A4CA61_9GAMM        | YQGRGAIQLSYNNYNG  |
| tr | D3EGU1 | D3EGU1_9BACI        | YYGRGPIMLSWNNFNYG |
| tr | A9KHM6 | A9KHM6_CLOPH        | YHGRGPIQLSYNNYNG  |
| tr | Q12JG0 | Q12JG0_SHEDO        | YYGRGALQLSYQSNYQ  |
| tr | C9QEL9 | C9QEL9_VIBOR        | YYGRGIIQLSWNNYNG  |
| tr | D0IKD1 | D0IKD1_9VIBR        | YYGRGVIQLSWNNYNG  |
| tr | B5YMF3 | B5YMF3_THAPS        | FFGRGAIQTSWNNYNYR |
| tr | B8C6K1 | B8C6K1_THAPS        | FFGRGAIQLSWNNYNYI |
| tr | B5YN07 | B5YN07_THAPS        | FYGRGAIQLSWNNYNYI |
| tr | B8LD35 | B8LD35_THAPS        | YFGRGSIQLSWNNYNYI |
| tr | B8LD51 | B8LD51_THAPS        | FFGRGAIQLSWNNYNYI |
| tr | B8BUZ0 | B8BUZ0_THAPS        | YFGRGAIQLSWNSNYL  |
| tr | B8LD34 | B8LD34_THAPS        | FFGRGSIQLSHNFNYI  |
| tr | Q8H6Y7 | Q8H6Y7_PHYIN        | YHGRGPIQLSWNNYNY  |
| tr | D0NXB9 | D0NXB9_PHYIN        | YHGRGPIQLSWNNYNY  |
| tr | D0NXB7 | D0NXB7_PHYIN        | YHGRGPIQIRWNNYNY  |
| tr | Q23JY1 | Q23JY1_TETTH        | YYGRGPLQLSWNNYNYA |
| tr | Q235U7 | Q235U7_TETTH        | YYGRGPLQLSWDNYNYI |
| tr | A4VCP5 | A4VCP5_TETTH        | YYGRGPIQLSWDNYNYK |
| tr | Q23VY2 | Q23VY2_TETTH        | YFGRGPVQLSWNNYNYA |
| tr | Q8MD06 | Q8MD06_LEUGL        | YYGRGPMQLSWNNYNYG |
| tr | Q8LK49 | Q8LK49_LEUGL        | YYGRGPMQLSWNNYNYG |
| tr | Q9FUH3 | Q9FUH3_VIGUS        | YYGRGPIQISWNNYNYG |
| tr | Q43685 | Q43685_VIGUN        | YYGRGPIQISWNNYNYG |
| tr | Q6UZ78 | Q6UZ78_PHAVU        | YYGRGPIQISWNNYNYG |
| tr | Q9LEB2 | Q9LEB2_PHAVU        | YYGRGPIQLSWNNYNYA |
| tr | Q9FXL8 | Q9FXL8_PSOTE        | YYGRGPIQISWNNYNYG |
| tr | O65331 | O65331_ELAUM        | YYSRGPMQLSWNNYNYG |
| tr | Q5I6L0 | Q5I6L0_HUMLU        | YYGRGPMQLSWNNYNYG |
| tr | B9HQY8 | B9HQY8_POPTR        | YYGRGPVQLSWNNYNYG |
| tr | B9HQY7 | B9HQY7_POPTR        | YYGRGPVQLSWNNYNYG |
| tr | A9PJS5 | A9PJS5_9ROSI        | YYGRGPVQLSWNNYNYG |
| tr | B9HQZ2 | B9HQZ2_POPTR        | YYGRGPVQLSWNNYNYG |
| tr | B9H1P7 | B9H1P7_POPTR        | YYGRGPMQLSWNNYNYG |
| tr | B9SIC4 | B9SIC4_RICCO        | YYGRGPIQLTWNNYNYG |
| tr | B0ZC08 | B0ZC08_CASGL        | YYGRGPIQLSWNNYNYG |
| tr | Q9SDW1 | Q9SDW1_PRUPE        | YYGRGPIQLSWNNYNYG |
| tr | Q4PJV8 | Q4PJV8_9ROSA        | YFGRGPIQLSWNNYNYG |
| tr | Q43853 | Q43853_ULMAM        | YFGRGPIQLSWNNYNYG |
| tr | Q8GUD7 | Q8GUD7_HEVBR        | YYGRGPIQLSWNNYNYG |
| tr | Q949H3 | Q949H3_HEVBR        | YYGRGPIQLSWNNYNYG |
| tr | Q9ZTT8 | Q9ZTT8_GOSHI        | YFGRGPMQLSWNNYNYG |
| tr | Q8VXF1 | Q8VXF1_MUSAC        | YYGRGPIQISFNYYNYG |
| tr | B5TYQ0 | B5TYQ0_MUSAC        | YYGRGPIQISFNYYNYG |
| tr | Q8VXF0 | Q8VXF0_MUSAC        | YYGRGPIQISFNYYNYG |
| tr | Q93WX9 | Q93WX9_MUSAC        | YYGRGPIQISFNYYNYG |
| tr | B6UYK7 | B6UYK7_MUSPR        | YYGRGPIQISFNYYNYG |
| tr | B6UYK6 | B6UYK6_MUSPR        | YYGRGPIQISFNYYNYG |
| tr | C3VD22 | C3VD22_MUSPR        | YYGRGPIQISFNYYNYG |
| tr | B5TYQ1 | B5TYQ1_MUSAC        | YYGRGPIQISYNNYNYG |
| tr | B9ZZZ5 | B9ZZZ5_VACCO        | YYGRGPIQISYNNYNYG |
| tr | Q9SPU0 | Q9SPU0_PETCR        | YYGRGPIQISYNNYNYG |
| tr | B2DD07 | B2DD07_CITUN        | YFGRGPIQISYNNYNYG |
| tr | Q6RH76 | Q6RH76_CAPAN        | YFGRGPIQISYNNYNYG |
| tr | P93154 | P93154_GOSHI        | YFGRGPIQISYNNYNYG |
| tr | Q9FS45 | Q9FS45_VITVI        | YYGRGPIQISYNNYNYG |
| tr | A5AT01 | A5AT01_VITVI        | YYGRGPIQISYNNYNYG |
| tr | D1HC88 | D1HC88_VITVI        | YYGRGPIQISYNNYNYG |
| tr | Q9ZTK4 | Q9ZTK4_VITVI        | YYGRGPIQISYNNYNYG |
| tr | A5AT00 | A5AT00_VITVI        | YYGRGPIQISYNNYNYG |
| tr | D0EWF1 | D0EWF1_CAMSI        | YYGRGPIQISHNYNYG  |
| tr | P93680 | P93680_PERAEE       | YYGRGPIQISYNNYNYG |
| tr | A3QRB6 | A3QRB6_VITVI        | YYGRGPIQISYNNYNYG |
| tr | Q546P8 | Q546P8_VITVI        | YYGRGPIQISYNNYNYG |
| tr | A3QRB7 | A3QRB7_VITVI        | YYGRGPIQISYNNYNYG |
| tr | Q6IVX2 | Q6IVX2_9CARY        | YYGRGPIQISYNNYNYG |
| tr | Q6IVX4 | Q6IVX4_9CARY        | YYGRGPIQISYNNYNYG |
| tr | P94084 | P94084_MEDSA        | YYGRGPIQISWNNYNYG |
| tr | P93327 | P93327_MEDTR        | YYGRGPIQISWNNYNYG |
| tr | Q5RLX9 | Q5RLX9_MEDSA        | YYGRGPIQISWNNYNYG |
| tr | Q7X9F5 | Q7X9F5_9FABA        | YYGRGPIQISWNNYNYG |
| tr | Q9ZP10 | Q9ZP10_CICAR        | YYGRGPIQLSWNNYNYG |

|    |        |              |                  |
|----|--------|--------------|------------------|
| tr | Q4JLT7 | Q4JLT7_CAPAN | YFGRGPIQISYNNYNG |
| tr | Q9AVA9 | Q9AVA9_CUCME | YFGRGPIQISYNNYNG |
| tr | B9VRK7 | B9VRK7_CAPAN | YFGRGPIQISYNNYNG |
| tr | Q9FEW1 | Q9FEW1_NICSY | YFGRGPIQISHNNYNG |
| tr | Q5W1I6 | Q5W1I6_NICGL | YFGRGPIQISHNNYNG |
| tr | O81144 | O81144_SOLTU | YFGRGPIQISYNNYNG |
| tr | O81145 | O81145_SOLTU | YFGRGPIQISHNNYNG |
| tr | Q84LQ7 | Q84LQ7_SOLDU | YFGRGPIQISHNNYNG |
| tr | Q6IV10 | Q6IV10_DRORT | YFGRGPIQISHNNYNG |
| tr | Q2HPK8 | Q2HPK8_SOLTU | YFGRGPIQISHNNYNG |
| tr | Q9SQL3 | Q9SQL3_POAPR | YFGRGPIQISYNNYNG |
| tr | Q9SQL4 | Q9SQL4_POAPR | YFGRGPIQISFNYYNG |
| tr | Q6T484 | Q6T484_WHEAT | YFGRGPIQISHNNYNG |
| tr | Q8W427 | Q8W427_WHEAT | YFGRGPIQISHNNYNG |
| tr | Q41539 | Q41539_WHEAT | YFGRGPIQISYNNYNG |
| tr | Q9AXR9 | Q9AXR9_SECCE | YFGRGPIQISYNNYNG |
| tr | B1B6T0 | B1B6T0_BROIN | YFGRGPIQISHNNYNG |
| tr | B8R3R6 | B8R3R6_FESAR | YYGRGPIQISYNNYNG |
| tr | Q4Z8L7 | Q4Z8L7_WHEAT | YYGRGPIQLSHNNYNG |
| tr | Q4Z8L8 | Q4Z8L8_WHEAT | YYGRGPIQLSHNNYNG |
| tr | Q6JBN6 | Q6JBN6_ZEAMP | YYGRGPIQISYNNYNG |
| tr | Q6JBM9 | Q6JBM9_ZEAMP | YYGRGPIQISYNNYNG |
| tr | Q6JBN3 | Q6JBN3_ZEAMP | YYGRGPIQISYNNYNG |
| tr | B8QVK2 | B8QVK2_ZEAMP | YYGRGPIQISYNNYNG |
| tr | Q6JBN5 | Q6JBN5_ZEAMP | YYGRGPIQISYNNYNG |
| tr | B8QVF2 | B8QVF2_ZEAMP | YYGRGPIQISYNNYNG |
| tr | B8QVF1 | B8QVF1_ZEAMP | YYGRGPIQISYNNYNG |
| tr | B8QVK0 | B8QVK0_ZEAMP | YYGRGPIQISYNNYNG |
| tr | B8QVG9 | B8QVG9_ZEAMP | YYGRGPIQISYNNYNG |
| tr | B8QVL4 | B8QVL4_ZEAMP | YYGRGPIQISYNNYNG |
| tr | B8QVH2 | B8QVH2_ZEAMP | YYGRGPIQISYNNYNG |
| tr | B8QVF8 | B8QVF8_ZEAMP | YYGRGPIQISYNNYNG |
| tr | B8QVM1 | B8QVM1_ZEAMP | YYGRGPIQISYNNYNG |
| tr | Q6JBM4 | Q6JBM4_ZEADI | YYGRGPIQISYNNYNG |
| tr | Q6JBN0 | Q6JBN0_ZEAMP | YYGRGPIQISYNNYNG |
| tr | B8QVL5 | B8QVL5_ZEAMP | YYGRGPIQISYNNYNG |
| tr | B8QVH0 | B8QVH0_ZEAMP | YYGRGPIQISYNNYNG |
| tr | B8QVI0 | B8QVI0_ZEAMP | YYGRGPIQISYNNYNG |
| tr | B8QVK5 | B8QVK5_ZEAMP | YYGRGPIQISYNNYNG |
| tr | B8QVF9 | B8QVF9_ZEAMP | YYGRGPIQISYNNYNG |
| tr | Q6JBN1 | Q6JBN1_ZEAMP | YYGRGPIQISYNNYNG |
| tr | B8QVF0 | B8QVF0_ZEAMP | YYGRGPIQISYNNYNG |
| tr | B8QVH5 | B8QVH5_ZEAMP | YYGRGPIQISYNNYNG |
| tr | B8QVI5 | B8QVI5_ZEAMP | YYGRGPIQISYNNYNG |
| tr | B8QVH1 | B8QVH1_ZEAMP | YYGRGPIQISYNNYNG |
| tr | B8QVI2 | B8QVI2_ZEAMP | YYGRGPIQISYNNYNG |
| tr | Q6JBN4 | Q6JBN4_ZEAMP | YYGRGPIQISYNNYNG |
| tr | B8QVM0 | B8QVM0_ZEAMP | YYGRGPIQISYNNYNG |
| tr | B8QVH4 | B8QVH4_ZEAMP | YYGRGPIQISYNNYNG |
| tr | B8QVH3 | B8QVH3_ZEAMP | YYGRGPIQISYNNYNG |
| tr | B8QVG8 | B8QVG8_ZEAMP | YYGRGPIQISYNNYNG |
| tr | B8QVL7 | B8QVL7_ZEAMP | YYGRGPIQISYNNYNG |
| tr | B8QVI1 | B8QVI1_ZEAMP | YYGRGPIQISYNNYNG |
| tr | B8QVJ5 | B8QVJ5_ZEAMP | YYGRGPIQISYNNYNG |
| tr | B8QVH7 | B8QVH7_ZEAMP | YYGRGPIQISYNNYNG |
| tr | B8QVH8 | B8QVH8_ZEAMP | YYGRGPIQISYNNYNG |
| tr | Q6JBM3 | Q6JBM3_ZEADI | YYGRGPIQISYNNYNG |
| tr | Q6JBM1 | Q6JBM1_ZEADI | YYGRGPIQISYNNYNG |
| tr | Q6JBL7 | Q6JBL7_ZEADI | YYGRGPIQISYNNYNG |
| tr | Q6JBM5 | Q6JBM5_ZEADI | YYGRGPIQISYNNYNG |
| tr | Q6JBL9 | Q6JBL9_ZEADI | YYGRGPIQISYNNYNG |
| tr | Q41794 | Q41794_MAIZE | YYGPRAIQISININIG |
| tr | C5YYH5 | C5YYH5_SORBI | YYGRGPIQISYNNYNG |
| tr | C6JSV0 | C6JSV0_SORBI | YYGRGPIQISYNNYNG |
| tr | C5YGD9 | C5YGD9_SORBI | YYGRGPIQISYNNYNG |
| tr | A2YH55 | A2YH55_ORYSI | YYGRGPIQISYNNYNG |
| tr | Q42995 | Q42995_ORYSA | YYGRGPIQISYNNYNG |
| tr | Q40667 | Q40667_ORYSA | YYGRGPIQISYNNYNG |
| tr | Q6U5G8 | Q6U5G8_ORYSJ | YYGRGPIQITYNYSYG |
| tr | Q0D9D3 | Q0D9D3_ORYSJ | YYGRGPIQITYNYSYG |
| tr | A2YH54 | A2YH54_ORYSI | YYGRGPIQITYNYSYG |
| tr | Q40668 | Q40668_ORYSA | YYGRGPIQITYNYSYG |
| tr | Q2HJJ5 | Q2HJJ5_MUSPR | YYGRGPIQLSYNFNYG |
| tr | A7UC81 | A7UC81_ORYSI | YYGRGPIQLSYNFNYG |
| tr | A2XI16 | A2XI16_ORYSI | YYGRGPIQLSYNFNYG |
| tr | A3AJ48 | A3AJ48_ORYSJ | YYGRGPIQLSYNFNYG |
| tr | Q6DUK0 | Q6DUK0_9CARY | YYGRGPIQISYNNYNG |

|    |        |              |                   |
|----|--------|--------------|-------------------|
| tr | Q38777 | Q38777_ALLSA | YYGRGPIQISYNNYNG  |
| tr | Q38776 | Q38776_ALLSA | YYGRGPIQISYNNYNG  |
| tr | A2V800 | A2V800_ANACO | YYGRGPIQISYNNYNG  |
| tr | Q6IVX8 | Q6IVX8_9CARY | YYGRGPIQLSYNNYNG  |
| tr | Q6SZS3 | Q6SZS3_ORYSA | YFGRGPIQLSYNNYNG  |
| tr | A2Y4F6 | A2Y4F6_ORYSI | YFGRGPIQLSYNNYNG  |
| tr | Q8VWZ5 | Q8VWZ5_ORYSA | YFGRGPIQLSYNNYNG  |
| tr | B9FPH6 | B9FPH6_ORYSJ | YFGRGPIQLSYNNYNG  |
| tr | Q42992 | Q42992_ORYSA | YFGRGPIQLSYNNYNG  |
| tr | Q6SPQ7 | Q6SPQ7_BAMOL | YFGRGPIQLSYNNYNG  |
| tr | C5YXM4 | C5YXM4_SORBI | YFGRGPIQISFNYYNG  |
| tr | B6TR38 | B6TR38_MAIZE | YFGRGPIQISFNYYNG  |
| tr | Q8W428 | Q8W428_WHEAT | YYGRGPIQLTHNNYNG  |
| tr | Q42970 | Q42970_ORYSA | YYGRGPIQLSFNFNYG  |
| tr | Q42839 | Q42839_HORVU | YYGRGPIMLSWNNYNG  |
| tr | C0LNR1 | C0LNR1_9MAGN | YYGRGPMQISYNNYNG  |
| tr | B8YPL6 | B8YPL6_9MAGN | YYGRGPMQISYNNYNG  |
| tr | Q9AVA7 | Q9AVA7_CUCME | YYGRGPFQITNNYNG   |
| tr | Q9FPM1 | Q9FPM1_FRAAN | YYGRGPIQLTHNNYNG  |
| tr | Q944U5 | Q944U5_FRAAN | YYGRGPIQLTHNNYNG  |
| tr | B9VQ31 | B9VQ31_PYRPY | YYGRGPIQLTHNNYNG  |
| tr | Q8RVN0 | Q8RVN0_MALDO | YYGRGPIQLTHNNYNG  |
| tr | Q8RVN2 | Q8RVN2_MALDO | YYGRGPIQLTHNNYNG  |
| tr | B8XR33 | B8XR33_9ROSA | YYGRGPIQLTHNNYNA  |
| tr | Q8RVN1 | Q8RVN1_MALDO | YYGRGPIQLTHNNYNG  |
| tr | B9S6S0 | B9S6S0_RICCO | YYGRGPIQLTHNNYNG  |
| tr | B5TYQ3 | B5TYQ3_9ROSI | YFGRGPIQLTHNNYNG  |
| tr | Q42428 | Q42428_CASSA | YYGRGPIQLTHNNYNG  |
| tr | Q7X9F4 | Q7X9F4_9FABA | YYGRGPIQLTNNYNG   |
| tr | Q7X9F6 | Q7X9F6_9FABA | YYGRGPIQITNNYNG   |
| tr | Q9SDY6 | Q9SDY6_SOYBN | YYGRGPIQLTHNNYNG  |
| tr | Q1W6C5 | Q1W6C5_9CARY | YYGRGPIQLTHNNYNA  |
| tr | B3VFX0 | B3VFX0_9CARY | YYGRGPIQLTHNNYNA  |
| tr | O80404 | O80404_9ROSI | YYGRGPIQLTHNNYNG  |
| tr | A7UGA7 | A7UGA7_CUCMO | YYGRGPIQLTHNNYNG  |
| tr | Q207U1 | Q207U1_MOMCH | YYGRGPIQLTHNNYNG  |
| tr | Q9AVA8 | Q9AVA8_CUCME | YYGRGPIQLTHNNYNG  |
| tr | A1BQQ0 | A1BQQ0_CUCSA | YYGRGPIQLTHNNYNG  |
| tr | Q9XFK6 | Q9XFK6_HUMLU | YYGRGPIQLTHNNYNG  |
| tr | Q43184 | Q43184_SOLTU | YFGRGPIQISYNNYNG  |
| tr | Q42878 | Q42878_SOLLC | YFGRGPIQISYNNYNG  |
| tr | Q9ZWS3 | Q9ZWS3_TOBAC | YFGRGPIQISYNNYNG  |
| tr | Q7X9R8 | Q7X9R8_EUOEU | YYGRGPMQLSWNNYNA  |
| tr | Q7Y237 | Q7Y237_EUOEU | YYGRGPMQLSWNNYNA  |
| tr | Q7Y238 | Q7Y238_EUOEU | YYGRGPIQLTWNYYNG  |
| tr | Q7X9R9 | Q7X9R9_EUOEU | YYGRGPMQLSWNNYNA  |
| tr | Q9M7F5 | Q9M7F5_BOEPA | YYGRGPMQLSWNNYNG  |
| tr | Q9M7H2 | Q9M7H2_BOEDR | YYGRGPMQLSWNNYNG  |
| tr | Q9M7G6 | Q9M7G6_ARAGU | YYGRGPMQLSWNNYNG  |
| tr | Q9M7H5 | Q9M7H5_ARAGU | YYGRGPMQLSWNNYNG  |
| tr | Q9M7H0 | Q9M7H0_ARAFE | YYGRGPMQLSWNNYNG  |
| tr | Q9M7G3 | Q9M7G3_9BRAS | YYGRGPMQLSWNNYNG  |
| tr | Q9M7G0 | Q9M7G0_ARALI | YYGRGPMQLSWNNYNG  |
| tr | Q9M7F7 | Q9M7F7_ARAMC | YYGRGPMQLSWNNYNG  |
| tr | Q9M7F9 | Q9M7F9_9BRAS | YYGRGPMQLSWNNYNG  |
| tr | Q9M7G1 | Q9M7G1_ARALI | YYGRGPIQLSWNNYNG  |
| tr | Q9M7F4 | Q9M7F4_BOEPA | YYGRGPMQLSWNNYNG  |
| tr | Q9M7F6 | Q9M7F6_ARAMC | YYGRGPMQLSWNNYNG  |
| tr | Q9M7F8 | Q9M7F8_ARAMC | YYGRGPMQLSWNNYNG  |
| tr | Q9M7G4 | Q9M7G4_9BRAS | YYGRGPMQLSWNNYNG  |
| tr | Q9M7H7 | Q9M7H7_ARAHO | YYGRGPIQLSWNNYNG  |
| tr | Q9M7G2 | Q9M7G2_ARALI | YYGRGPIQLSWNNYNG  |
| tr | Q9M7H1 | Q9M7H1_ARAFE | YYGRGPIQLSWNNYNG  |
| tr | Q9M7G7 | Q9M7G7_ARAGL | YYGRGPMQLSWNNYNG  |
| tr | Q9M7H9 | Q9M7H9_ARAAL | YYGRGPMQLSWNNYDYG |
| tr | Q9M7H3 | Q9M7H3_ARABL | YYGRGPMQLSWNNYNG  |
| tr | Q9SXJ1 | Q9SXJ1_ARAGE | YYGRGPMQLTWNYYNG  |
| tr | Q9M7G5 | Q9M7G5_9BRAS | YYGRGPIQLSWNNYNG  |
| tr | Q9M7G9 | Q9M7G9_ARAGL | YYGRGPMQLTWNYYNG  |
| tr | Q9M7H4 | Q9M7H4_ARABL | YYGRGPMQLTWNYYNG  |
| tr | Q1L0Q6 | Q1L0Q6_BOEDR | YYGRGPMQLSWNNYNG  |
| tr | Q9M7G8 | Q9M7G8_ARAGL | YYGRGPMQLLWNNYNG  |
| tr | A9P2N2 | A9P2N2_PICSI | YYGRGPMQLSWNNYNG  |
| tr | A9NPF6 | A9NPF6_PICSI | YYGRGPMQLSWNNYNG  |
| tr | A9NUA7 | A9NUA7_PICSI | YYGRGPMQLSWNNYNG  |
| tr | A9NLC7 | A9NLC7_PICSI | YYGRGPIQLSWNNYNG  |
| tr | Q76JH6 | Q76JH6_CRYJA | YYGRGPIQLSWNNYNG  |

|    |        |              |                   |
|----|--------|--------------|-------------------|
| tr | Q403K0 | Q403K0_CRYJA | YYGRGPIQLSWNYYNI  |
| tr | Q76JK0 | Q76JK0_CRYJA | YYGRGPIQLSWNYYNI  |
| tr | Q76JJ7 | Q76JJ7_CRYJA | YYGRGPIQLSWNYYNI  |
| tr | A2PZ52 | A2PZ52_CRYJA | YYGRGPIQLSWNYYNI  |
| tr | Q76IR2 | Q76IR2_TAXDI | YYGRGPIQLSWNYYNI  |
| tr | A2PZ63 | A2PZ63_CHAOB | YYGRGPIQLSWNYYNI  |
| tr | A2PZ64 | A2PZ64_CHAOB | YYGRGPIQLSWNYYNI  |
| tr | A2PZ61 | A2PZ61_9CONI | YYGRGPIQLSWNYYNI  |
| tr | A2PZ59 | A2PZ59_9CONI | YYGRGPIQLSWNYYNI  |
| tr | A2PZ60 | A2PZ60_9CONI | YYGRGPIQLSWNYYNI  |
| tr | A2PZ58 | A2PZ58_9CONI | YYGRGPIQLSWNYYNI  |
| tr | Q6E6M9 | Q6E6M9_PICAB | YHGRGPIQLTGDYNYK  |
| tr | Q6SSF1 | Q6SSF1_PICAB | YHGRGPIQLAGDYNYK  |
| tr | C0PQM5 | C0PQM5_PICSI | YHGRGPIQLTGDYNYK  |
| tr | A9NXF9 | A9NXF9_PICSI | YHGRGPIQLTGDYNYK  |
| tr | O04276 | O04276_PINST | YRGRGPIQLTGDYNYK  |
| tr | C0PST0 | C0PST0_PICSI | YYGRGPIQLTGKNNYE  |
| tr | A9NTQ9 | A9NTQ9_PICSI | YYGRGPIQLTGKNNYE  |
| tr | A9NU92 | A9NU92_PICSI | YYGRGPIQLTGKSNEY  |
| tr | C0P3M6 | C0P3M6_MAIZE | YYGRGPIQLTHEYNYR  |
| tr | B6SZC6 | B6SZC6_MAIZE | YYGRGPIQLTHEYNYR  |
| tr | C5WZU7 | C5WZU7_SORBI | YYGRGPIQLTHEYNYR  |
| tr | C0HEI0 | C0HEI0_MAIZE | YYGRGPIQLTHKYNYR  |
| tr | B4F9D5 | B4F9D5_MAIZE | YYGRGPIQLTHKYNYR  |
| tr | B6T6W1 | B6T6W1_MAIZE | YYGRGPIQLTHKYNYR  |
| tr | A2XC48 | A2XC48_ORYSI | YYGRGPIQLTHKYNYQ  |
| tr | O04272 | O04272_ORYSA | YYGRRPYTLLISTTTS  |
| tr | Q8H0C9 | Q8H0C9_VIGUN | YYGRGPIQLTHNYNYN  |
| tr | O81934 | O81934_CANEN | YYGRGPIQLTHNYNYA  |
| tr | Q42515 | Q42515_ARAHY | YYGRGPIQLTSNSNYQ  |
| tr | Q43752 | Q43752_CITSI | YYGRGPIQLSWNYYNL  |
| tr | Q8H986 | Q8H986_CITJA | YYGRGPIQLTWNYYNL  |
| tr | Q8H985 | Q8H985_CITJA | YYGRGPIQLTWNYYNL  |
| tr | O04222 | O04222_HELAN | YFGRGPIQLTNNNNYG  |
| tr | Q8W4Z2 | Q8W4Z2_ORYSI | YYGRGPIQLTGQSNYQ  |
| tr | O24007 | O24007_ORYSA | YYGRGPIQLTGQSNYQ  |
| tr | A2Z9V6 | A2Z9V6_ORYSI | YYGRGPIQLTGQSNYQ  |
| tr | O04271 | O04271_ORYSA | YYGRGPIQLTGQSNYQ  |
| tr | Q7G1L6 | Q7G1L6_ORYSA | YYGRGPIQLTGQSNYQ  |
| tr | D2CVR3 | D2CVR3_HORVD | YYGRGPIQLTGQSNYD  |
| tr | Q43765 | Q43765_HORVU | YYGRGPIQLTGQSNYD  |
| tr | Q9AXR8 | Q9AXR8_SECCE | YYGRGPIQLTGRSNYD  |
| tr | Q8W429 | Q8W429_WHEAT | YYGRGPIQLTGRSNYD  |
| tr | Q43764 | Q43764_HORVU | YYGRGPIQLTGRSNYD  |
| tr | C8CG67 | C8CG67_9POAL | YYGRGPIQLTGRSNYD  |
| tr | Q9LEH7 | Q9LEH7_HORVU | YYGRGPIQLTGQSNYD  |
| tr | Q43834 | Q43834_SOLTU | YYGRGPIQLTHQSNYE  |
| tr | Q9SBJ9 | Q9SBJ9_SOLTU | YYGRGPIQLTHQSNYE  |
| tr | Q43835 | Q43835_SOLTU | YYGRGPIQLTHQSNYE  |
| tr | O22568 | O22568_SOLTU | YYGRGPIQLTHQSNYE  |
| tr | Q7Y0S1 | Q7Y0S1_SOLLC | YYGRGPIQLTHQSNYE  |
| tr | O82552 | O82552_CAPAN | YYGRGPIQLTHRSNYE  |
| tr | B2NIX6 | B2NIX6_CAPCH | YYGRGPIQLTHRSNYE  |
| tr | C5IDR3 | C5IDR3_CAPCH | FYGRGPIQLTGQSNYE  |
| tr | Q6IV09 | Q6IV09_DRORT | YYGRGPIQLTNRNNYE  |
| tr | Q41795 | Q41795_MAIZE | YFGRGPIQLSYNNYNG  |
| tr | B9HQY9 | B9HQY9_POPTR | YCGRGPIQLSWNYYNG  |
| tr | B9HQY6 | B9HQY6_POPTR | YCGRGPIQLSWNYYNG  |
| tr | B9HQZ1 | B9HQZ1_POPTR | YCGRGPIQLSWNYYNG  |
| tr | O65330 | O65330_ELAUM | YYGRGPIQLSWNYYNG  |
| tr | Q9SQF7 | Q9SQF7_BRAJU | YYGRGPMMLSWNYYNG  |
| tr | Q2HZ51 | Q2HZ51_BRAJU | YYGRGPIMLSWNYYNG  |
| tr | Q42421 | Q42421_BETVU | YYGRGPIVQLTWNFNYG |
| tr | B8QVG3 | B8QVG3_ZEAMP | YYGRGPIQISYNNYNG  |
| tr | Q43852 | Q43852_WHEAT | YYGRGPIQLTHNYNYG  |
| tr | Q9LE03 | Q9LE03_CUCME | YYGRGPMQLKGNQNYG  |
| tr | Q6QNA9 | Q6QNA9_MUSBA | YFGRGPIQISHNNYNG  |
| tr | Q6QNB2 | Q6QNB2_MUSAC | YFGRGPIQISHNNYNG  |
| tr | Q6R8K3 | Q6R8K3_MUSAC | YFGRGPIQISHNNYNG  |
| tr | C1K2M3 | C1K2M3_PANGI | YYGRGPIQLTHNYNYG  |
| tr | Q5I707 | Q5I707_LINUS | YYGRGPIQLTHNYNYG  |
| tr | B9FPF7 | B9FPF7_ORYSJ | YHARGPMQIAYNNYNG  |
| tr | B9H1P8 | B9H1P8_POPTR | YYGRGPIQLRWNNYNG  |
| tr | Q9ZT61 | Q9ZT61_SAMNI | YNRRGPIQLTHNYNYG  |
| tr | Q9SYS5 | Q9SYS5_SAMNI | YNRRGPIQLTHNYNYG  |
| tr | Q9SYS4 | Q9SYS4_SAMNI | YNRRGPIQLTHNYNYG  |
| tr | Q944B9 | Q944B9_SAMNI | YNSRGPIQLTHNYNYG  |

|    |        |              |                    |
|----|--------|--------------|--------------------|
| tr | Q9ZT60 | Q9ZT60_SAMNI | YNSRGPFIQLTHNYYYG  |
| tr | Q944B8 | Q944B8_SAMNI | YNSRGPFIQLTHNYYYG  |
| tr | A7XQ02 | A7XQ02_MORAL | YNSRGAVQLTHNYYNYG  |
| tr | Q84LK1 | Q84LK1_FICCA | YNSRGPFIQLTHNHNYG  |
| tr | Q2VAC7 | Q2VAC7_FICAW | YNRRGPFIQLTHNHNYG  |
| tr | B9GTA5 | B9GTA5_POPTR | YKGRGPFIQLSWNYYNYG |
| tr | B9I9A3 | B9I9A3_POPTR | YKGRGPFIQLSWNYYNYG |
| tr | C6TI96 | C6TI96_SOYBN | YKGRGPFIQLSWNYYNYG |
| tr | A5BE14 | A5BE14_VITVI | YKGRGPFIQLSWNYYNYG |
| tr | D1IUL3 | D1IUL3_VITVI | YKGRGPFIQLSWNYYNYG |
| tr | B9RN36 | B9RN36_RICCO | YKGRGPFIQLSWNFNYG  |
| tr | Q43322 | Q43322_ARAHY | YKGRGPFIQLSWNYYNYG |
| tr | C6TNB0 | C6TNB0_SOYBN | YKGRGPFIQLSWNYYNYG |
| tr | Q9SPT9 | Q9SPT9_PETCR | YQGRGPFIQLSWNYYNYG |
| tr | Q9SPT8 | Q9SPT8_PETCR | YQGRGPFIQLSWNYYNYG |
| tr | B2X051 | B2X051_FRAAN | YKGRGPFIQLSWNYYNYG |
| tr | Q9SBT5 | Q9SBT5_FRAAN | YKGRGPFIQLSWNYYNYG |
| tr | A5JW48 | A5JW48_FRAAN | YKGRGPFIQLSWNYYNYG |
| tr | Q9ZSI6 | Q9ZSI6_ARATH | YKGRGPFIQLSWNYYNYG |
| tr | Q9FZ25 | Q9FZ25_ARATH | YQGRGPFIQLSWNYYNYG |
| tr | Q6AT95 | Q6AT95_ORYSJ | YHGRGPFIQLSWNFNYG  |
| tr | A2Y074 | A2Y074_ORYSI | YHGRGPFIQLSWNFNYG  |
| tr | C5YZL4 | C5YZL4_SORBI | YHGRGPFIQLSWNFNYG  |
| tr | Q9ZSE8 | Q9ZSE8_CYNDA | YHGRGPFIQLSWNFNYG  |
| tr | O22520 | O22520_CYNDA | YHGRGPFIQLSWNFNYG  |
| tr | Q9ZSE7 | Q9ZSE7_CYNDA | YHGRGPFIQLSWNFNYG  |
| tr | C5XHZ4 | C5XHZ4_SORBI | YHGRGPFIQLSWNFNYG  |
| tr | A2WNN5 | A2WNN5_ORYSI | YHGRGPFIQLSWNFNYG  |
| tr | O22425 | O22425_ORYSA | YHGGPFIQLSWNFNYG   |
| tr | A9NS04 | A9NS04_PICSI | YHGRGALPLYWNYNYG   |
| tr | C0PPT3 | C0PPT3_PICSI | YHGRGALPLYWNYNYG   |
| tr | A9NT20 | A9NT20_PICSI | YHGRGALPLYWNYNYG   |
| tr | B4G1H3 | B4G1H3_MAIZE | YYGRGAIPVYWNYNYG   |
| tr | C5X4J4 | C5X4J4_SORBI | YYGRGAIPVYWNYNYG   |
| tr | Q0J0L1 | Q0J0L1_ORYSJ | YYGRGAIPVFWNYNYG   |
| tr | A2Z2P0 | A2Z2P0_ORYSI | YYGRGAIPVFWNYNYG   |
| tr | D2KZ17 | D2KZ17_9ARAE | YHGRGALPLYWNYNYG   |
| tr | A2Q575 | A2Q575_MEDTR | YYGRGAIPYWNYNYG    |
| tr | Q76KW5 | Q76KW5_PEA   | YYGRGAIPYWNYNYG    |
| tr | C6TD22 | C6TD22_SOYBN | YYGRGAIPFVWNYNYG   |
| tr | C0SUT2 | C0SUT2_ARATH | YYGRGALPIYWNFYNYG  |
| tr | Q9MA41 | Q9MA41_ARATH | YYGRGALPIYWNFYNYG  |
| tr | A8IXW1 | A8IXW1_BRACM | YYGRGALPIYWNFYNYG  |
| tr | A8IXW2 | A8IXW2_BRACM | YYGRGALPIYWNFYNYG  |
| tr | Q7X7Q1 | Q7X7Q1_GOSHI | YYGRGALPIYWNFYNYG  |
| tr | Q6JX03 | Q6JX03_GOSHI | YHGRGALPIYWNFYNYG  |
| tr | Q6UA09 | Q6UA09_GOSBA | YHGRGALPIYWNFYNYG  |
| tr | B5G510 | B5G510_GOSBA | YHGRGALPIYWNFYNYG  |
| tr | Q6JX04 | Q6JX04_GOSHI | YHGRGALPIYWNFYNYG  |
| tr | B5G507 | B5G507_GOSBA | YHGRGALPIYWNFYNYG  |
| tr | B5G509 | B5G509_GOSBA | YHGRGALPIYWNFYNYG  |
| tr | B5G508 | B5G508_GOSBA | YHGRGALPIYWNFYNYG  |
| tr | B9VQ32 | B9VQ32_PYRPP | YHGRGALPLYWNYNYG   |
| tr | A9P7W2 | A9P7W2_POPTR | YHGRGALPLYWNYNYG   |
| tr | B9RZM8 | B9RZM8_RICCO | YHGRGALPLYWNYNYG   |
| tr | A5B1C7 | A5B1C7_VITVI | YFGRGALPIYWNFYNYG  |
| tr | D1HNU6 | D1HNU6_VITVI | YFGRGALPIYWNFYNYG  |
| tr | B9RPJ5 | B9RPJ5_RICCO | YYGRGALPIYWNFYNYG  |
| tr | D1J1H7 | D1J1H7_VITVI | YYGRGALPIFWNYNYG   |
| tr | Q9LSP9 | Q9LSP9_ARATH | YHGRGALPVYWNYNYG   |
| tr | C6TAW6 | C6TAW6_SOYBN | YYGRGAIPLYWNYNYG   |
| tr | C6TIR8 | C6TIR8_SOYBN | YYGRGAIPLYWNYNYG   |
| tr | B9IA90 | B9IA90_POPTR | YYGRGAIPFVWNYNYG   |
| tr | A9PHL3 | A9PHL3_POPTR | YYGRGAIPFVWNYNYG   |
| tr | Q1W6C4 | Q1W6C4_9CARY | YYGRGALPIYWNFYNYG  |
| tr | B3VFX1 | B3VFX1_9CARY | YYGRGALPIYWNFYNYG  |
| tr | A2YX68 | A2YX68_ORYSI | YYGRGALPVYWNYNYG   |
| tr | Q84QQ7 | Q84QQ7_ORYSJ | YYGRGALPVYWNYNYG   |
| tr | C5YIM8 | C5YIM8_SORBI | YYGRGALPVYWNYNYG   |
| tr | A9TSG6 | A9TSG6_PHYPA | YYGRGAFPLYWNYNYG   |
| tr | A9SXI5 | A9SXI5_PHYPA | YYGRGAFPLYWNYNYG   |
| tr | A9TSE2 | A9TSE2_PHYPA | YHGRGAFPLYWNFYNYG  |
| tr | C5KAJ7 | C5KAJ7_9ALVE | YYGRGALQLSYNFNYG   |
| tr | C5LPC3 | C5LPC3_9ALVE | YYGRGALQLSWNYNYG   |
| tr | C5KT12 | C5KT12_9ALVE | YSGRGAKQISYNYNYG   |
| tr | C5KMD1 | C5KMD1_9ALVE | YFGRGAAQISWNYNYG   |
| tr | Q2SMW1 | Q2SMW1_HAHCH | YFGRGAKQLSYNYNYG   |

|    |        |              |                   |
|----|--------|--------------|-------------------|
| tr | A4BH92 | A4BH92_9GAMM | YFGRGAKQLSYNRYNYG |
| tr | A8AIM5 | A8AIM5_CITK8 | YFGRGAKQLSYNRYNYG |
| tr | D2ZAE8 | D2ZAE8_9ENTR | YFGRGAKQLSYNRYNYG |
| tr | B4TYE6 | B4TYE6_SALSV | YFGRGAKQLSYNRYNYG |
| tr | B5C920 | B5C920_SALET | YFGRGAKQLSYNRYNYG |
| tr | B5NMR8 | B5NMR8_SALET | YFGRGAKQLSYNRYNYG |
| tr | B3YM59 | B3YM59_SALET | YFGRGAKQLSYNRYNYG |
| tr | Q8ZRN8 | Q8ZRN8_SALTY | YFGRGAKQLSYNRYNYG |
| tr | D0ZKY9 | D0ZKY9_SALT1 | YFGRGAKQLSYNRYNYG |
| tr | B5R425 | B5R425_SALEP | YFGRGAKQLSYNRYNYG |
| tr | B5FJ33 | B5FJ33_SALDC | YFGRGAKQLSYNRYNYG |
| tr | B5C3J2 | B5C3J2_SALET | YFGRGAKQLSYNRYNYG |
| tr | B5MUQ3 | B5MUQ3_SALET | YFGRGAKQLSYNRYNYG |
| tr | B5F8U7 | B5F8U7_SALA4 | YFGRGAKQLSYNRYNYG |
| tr | B5PN43 | B5PN43_SALET | YFGRGAKQLSYNRYNYG |
| tr | B4TK61 | B4TK61_SALHS | YFGRGAKQLSYNRYNYG |
| tr | B5P9D5 | B5P9D5_SALET | YFGRGAKQLSYNRYNYG |
| tr | B5R5I9 | B5R5I9_SALG2 | YFGRGAKQLSYNRYNYG |
| tr | C0Q6K9 | C0Q6K9_SALPC | YFGRGAKQLSYNRYNYG |
| tr | B4SV15 | B4SV15_SALNS | YFGRGAKQLSYNRYNYG |
| tr | A9N0T7 | A9N0T7_SALPB | YFGRGAKQLSYNRYNYG |
| tr | B5Q115 | B5Q115_SALHA | YFGRGAKQLSYNRYNYG |
| tr | B4A398 | B4A398_SALNE | YFGRGAKQLSYNRYNYG |
| tr | Q8Z999 | Q8Z999_SALTI | YFGRGAKQLSYNRYNYG |
| tr | Q57T22 | Q57T22_SALCH | YFGRGAKQLSYNRYNYG |
| tr | B5MSD4 | B5MSD4_SALET | YFGRGAKQLSYNRYNYG |
| tr | Q5PD79 | Q5PD79_SALPA | YFGRGAKQLSYNRYNYG |
| tr | B5BAP3 | B5BAP3_SALPK | YFGRGAKQLSYNRYNYG |
| tr | B5N8A4 | B5N8A4_SALET | YFGRGAKQLSYNRYNYG |
| tr | C9X780 | C9X780_SALTD | YFGRGAKQLSYNRYNYG |
| tr | A9MPH5 | A9MPH5_SALAR | YFGRGAKQLSYNRYNYG |
| tr | C9XWB9 | C9XWB9_CROTZ | YFGRGAKQLSYNRYNYG |
| tr | A7MEM6 | A7MEM6_ENTS8 | YFGRGAKQLSYNRYNYG |
| tr | B0U0H9 | B0U0H9_FRAP2 | YFGRGAKQLSYNRYNYG |
| tr | C6YSN8 | C6YSN8_9GAMM | YFGRGAKQLSYNRYNYG |
| tr | Q5E5Z2 | Q5E5Z2_VIBF1 | YFGRGAKQLSYNRYNYG |
| tr | B5FDD8 | B5FDD8_VIBFM | YFGRGAKQLSYNRYNYG |
| tr | C9Q4P1 | C9Q4P1_9VIBR | YFGRGAKQLSYNRYNYG |
| tr | Q1ZMW5 | Q1ZMW5_PHOAS | YFGRGAKQLSYNRYNYG |
| tr | Q0ZKA9 | Q0ZKA9_AERHY | YFGRGAKQLSYNRYNYG |
| tr | A0KGX5 | A0KGX5_AERHH | YFGRGAKQLSYNRYNYG |
| tr | A4SQY0 | A4SQY0_AERS4 | YFGRGAKQLSYNRYNYG |
| tr | B1KH86 | B1KH86_SHEWM | YFGRGAKQLSYNRYNYG |
| tr | C8Q541 | C8Q541_9ENTR | YFGRGAKQLSYNRYNYG |
| tr | Q7NWT2 | Q7NWT2_CHRVO | YFGRGAKQLSYNRYNYG |
| tr | A6D262 | A6D262_9VIBR | YFGRGAKQLSYHFNYG  |
| tr | D0Z4N1 | D0Z4N1_LISDA | YFGRGAKQLSYHFNYG  |
| tr | Q6LQ48 | Q6LQ48_PHOPR | YFGRGAKQLSYHFNYG  |
| tr | Q1Z8D8 | Q1Z8D8_PHOPR | YFGRGAKQLSYHFNYG  |
| tr | A0KKT5 | A0KKT5_AERHH | YFGRGAKQLSYHFNYG  |
| tr | A4SMT5 | A4SMT5_AERS4 | YFGRGAKQLSYHFNYG  |
| tr | D0HRW5 | D0HRW5_VIBCH | YFGRGAKQLSYHFNYG  |
| tr | C6RVV6 | C6RVV6_VIBCH | YFGRGAKQLSYHFNYG  |
| tr | A1EIH9 | A1EIH9_VIBCH | YFGRGAKQLSYHFNYG  |
| tr | Q9KTW1 | Q9KTW1_VIBCH | YFGRGAKQLSYHFNYG  |
| tr | C3NTC5 | C3NTC5_VIBCJ | YFGRGAKQLSYHFNYG  |
| tr | A1F0S9 | A1F0S9_VIBCH | YFGRGAKQLSYHFNYG  |
| tr | A2PEJ3 | A2PEJ3_VIBCH | YFGRGAKQLSYHFNYG  |
| tr | A3GK58 | A3GK58_VIBCH | YFGRGAKQLSYHFNYG  |
| tr | C3LT22 | C3LT22_VIBCM | YFGRGAKQLSYHFNYG  |
| tr | A3GWU6 | A3GWU6_VIBCH | YFGRGAKQLSYHFNYG  |
| tr | C6YDY1 | C6YDY1_VIBCH | YFGRGAKQLSYHFNYG  |
| tr | C2JA78 | C2JA78_VIBCH | YFGRGAKQLSYHFNYG  |
| tr | C2IIH7 | C2IIH7_VIBCH | YFGRGAKQLSYHFNYG  |
| tr | A5F3F2 | A5F3F2_VIBC3 | YFGRGAKQLSYHFNYG  |
| tr | A6XTA3 | A6XTA3_VIBCH | YFGRGAKQLSYHFNYG  |
| tr | D0I240 | D0I240_VIBCH | YFGRGAKQLSYHFNYG  |
| tr | A2PP35 | A2PP35_VIBCH | YFGRGAKQLSYHFNYG  |
| tr | C2HVC2 | C2HVC2_VIBCH | YFGRGAKQLSYHFNYG  |
| tr | A6Y174 | A6Y174_VIBCH | YFGRGAKQLSYHFNYG  |
| tr | D0H692 | D0H692_VIBCH | YFGRGAKQLSYHFNYG  |
| tr | C2CD72 | C2CD72_VIBCH | YFGRGAKQLSYHFNYG  |
| tr | C2IB96 | C2IB96_VIBCH | YFGRGAKQLSYHFNYG  |
| tr | C9Q8B6 | C9Q8B6_9VIBR | YFGRGAKQLSYHFNYG  |
| tr | A2PCK1 | A2PCK1_VIBCH | YFGRGAKQLSYHFNYG  |
| tr | A6AA89 | A6AA89_VIBCH | YFGRGAKQLSYHFNYG  |
| tr | A5ZZR1 | A5ZZR1_VIBCH | YFGRGAKQLSYHFNYG  |

|    |        |              |                  |
|----|--------|--------------|------------------|
| tr | A3EI83 | A3EI83_VIBCH | YFGRGAKQLSYHFNYG |
| tr | C2IPD1 | C2IPD1_VIBCH | YFGRGAKQLSYHFNYG |
| tr | D0IGQ8 | D0IGQ8_9VIBR | YFGRGAKQLSYHFNYG |
| tr | D2YJW8 | D2YJW8_VIBMI | YFGRGAKQLSYHFNYG |
| tr | D2YIE0 | D2YIE0_VIBMI | YFGRGAKQLSYHFNYG |
| tr | D0GSC2 | D0GSC2_VIBMI | YFGRGAKQLSYHFNYG |
| tr | D0HEX5 | D0HEX5_VIBMI | YFGRGAKQLSYHFNYG |
| tr | B8K769 | B8K769_VIBPA | YFGRGAKQLSYHFNYG |
| tr | C9QJ20 | C9QJ20_VIBOR | YFGRGAKQLSYHFNYG |
| tr | C9NQM1 | C9NQM1_9VIBR | YFGRGAKQLSYHFNYG |
| tr | A6AQ45 | A6AQ45_VIBHA | YFGRGAKQLSYHFNYG |
| tr | A7MU32 | A7MU32_VIBHB | YFGRGAKQLSYHFNYG |
| tr | D0XDG9 | D0XDG9_VIBHA | YFGRGAKQLSYHFNYG |
| tr | Q87S05 | Q87S05_VIBPA | YFGRGAKQLSYHFNYG |
| tr | A6B4H6 | A6B4H6_VIBPA | YFGRGAKQLSYHFNYG |
| tr | A7K170 | A7K170_VIBSE | YFGRGAKQLSYHFNYG |
| tr | D0WU94 | D0WU94_VIBAL | YFGRGAKQLSYHFNYG |
| tr | Q1VAD4 | Q1VAD4_VIBAL | YFGRGAKQLSYHFNYG |
| tr | A8T7I7 | A8T7I7_9VIBR | YFGRGAKQLSYHFNYG |
| tr | Q8DF08 | Q8DF08_VIBVU | YFGRGAKQLSYHFNYG |
| tr | Q7MNE0 | Q7MNE0_VIBVY | YFGRGAKQLSYHFNYG |
| tr | B7VJU9 | B7VJU9_VIBSL | YFGRGAKQLSYHFNYG |
| tr | A3XVP4 | A3XVP4_9VIBR | YFGRGAKQLSYHFNYG |
| tr | A3USZ8 | A3USZ8_VIBSP | YFGRGAKQLSYHFNYG |
| tr | A5L6K2 | A5L6K2_9GAMM | YFGRGAKQLSYHFNYG |
| tr | Q25BT4 | Q25BT4_VIBPR | YFGRGAKQLSYHFNYG |
| tr | B5FEC6 | B5FEC6_VIBFM | YFGRGAKQLSYHFNYG |
| tr | Q5E511 | Q5E511_VIBF1 | YFGRGAKQLSYHFNYG |
| tr | C9P6B1 | C9P6B1_VIBME | YFGRGAKQLSYHFNYG |
| tr | Q2C9C9 | Q2C9C9_9GAMM | YFGRGAKQLSYHFNYG |
| tr | Q1ZTF9 | Q1ZTF9_PHOAS | YFGRGAKQLSYHFNYG |
| tr | A6FHW3 | A6FHW3_9GAMM | YFGRGAKQLSYHFNYG |
| tr | A4C3H5 | A4C3H5_9GAMM | YFGRGAKQLSYHFNYG |
| tr | Q9WXI9 | Q9WXI9_9GAMM | YFGRGSKQLSWNRYNG |
| tr | Q65ZB0 | Q65ZB0_CAEEL | YFGRGAIQISYNYNYG |
| tr | Q17816 | Q17816_CAEEL | YFGRGAIQISYNYNYG |
| tr | Q95Y59 | Q95Y59_CAEEL | YFGRGAIQISYNYNYG |
| tr | A8X8X1 | A8X8X1_CAEER | YFGRGAIQISYNYNYG |
| tr | P92013 | P92013_CAEEL | YFGRGGIQISYNYNYG |
| tr | A8XBA9 | A8XBA9_CAEER | YFGRGAIQISYNYNYG |
| tr | Q962Y5 | Q962Y5_ASCSU | YFGRGALQISYNYNYG |
| tr | A8XUD2 | A8XUD2_CAEER | YFGRGALQLSWNRYNG |
| tr | O16512 | O16512_CAEEL | YFGRGALQLSWNRYNG |
| tr | B8QUT7 | B8QUT7_ZEAMP | YYGRGPLQISWNYNYG |
| tr | B8QUY7 | B8QUY7_ZEAMP | YYGRGPLQISWNYNYG |
| tr | B8QUX1 | B8QUX1_ZEAMP | YYGRGPLQISWNYNYG |
| tr | B8QUU3 | B8QUU3_ZEAMP | YYGRGPLQISWNYNYG |
| tr | B8QUX8 | B8QUX8_ZEAMP | YYGRGPLQISWNYNYG |
| tr | B8QUS6 | B8QUS6_ZEAMP | YYGRGPLQISWNYNYG |
| tr | B8QUY4 | B8QUY4_ZEAMP | YYGRGPLQISWNYNYG |
| tr | B8QUX5 | B8QUX5_ZEAMP | YYGRGPLQISWNYNYG |
| tr | B8QUT5 | B8QUT5_ZEAMP | YYGRGPLQISWNYNYG |
| tr | B8QUS5 | B8QUS5_ZEAMP | YYGRGPLQISWNYNYG |
| tr | B8QUX2 | B8QUX2_ZEAMP | YYGRGPLQISWNYNYG |
| tr | B8QUX6 | B8QUX6_ZEAMP | YYGRGPLQISWNYNYG |
| tr | B8QUT1 | B8QUT1_ZEAMP | YYGRGPLQISWNYNYG |
| tr | B8QUX9 | B8QUX9_ZEAMP | YYGRGPLQISWNYNYG |
| tr | B8QUY1 | B8QUY1_ZEAMP | YYGRGPLQISWNYNYG |
| tr | B8QUW8 | B8QUW8_ZEAMP | YYGRGPLQISWNYNYG |
| tr | B8QUY6 | B8QUY6_ZEAMP | YYGRGPLQISWNYNYG |
| tr | B8QUS9 | B8QUS9_ZEAMP | YYGRGPLQISWNYNYG |
| tr | B8QUS2 | B8QUS2_ZEAMP | YYGRGPLQISWNYNYG |
| tr | B8QUS3 | B8QUS3_ZEAMP | YYGRGPLQISWNYNYG |
| tr | B8QUT0 | B8QUT0_ZEAMP | YYGRGPLQISWNYNYG |
| tr | B8QUY2 | B8QUY2_ZEAMP | YYGRGPLQISWNYNYG |
| tr | B8QUZ0 | B8QUZ0_ZEAMP | YYGRGPLQISWNYNYG |
| tr | B8QUT7 | B8QUT7_ZEAMP | YYGRGPLQISWNYNYG |
| tr | B8QUS8 | B8QUS8_ZEAMP | YYGRGPLQISWNYNYG |
| tr | B8QUU0 | B8QUU0_ZEAMP | YYGRGPLQISWNYNYG |
| tr | B8QUT9 | B8QUT9_ZEAMP | YYGRGPLQISWNYNYG |
| tr | B8QUZ1 | B8QUZ1_ZEAMP | YYGRGPLQISWNYNYG |
| tr | B8QUZ6 | B8QUZ6_ZEAMP | YYGRGPLQISWNYNYG |
| tr | B8QUU6 | B8QUU6_ZEAMP | YYGRGPLQISWNYNYG |
| tr | B8QUV5 | B8QUV5_ZEAMP | YYGRGPLQISWNYNYG |
| tr | B8QUU9 | B8QUU9_ZEAMP | YYGRGPLQISWNYNYG |
| tr | B8QUV1 | B8QUV1_ZEAMP | YYGRGPLQISWNYNYG |
| tr | B8QUS1 | B8QUS1_ZEAMP | YYGRGPLQISWNYNYG |

|    |        |              |                   |
|----|--------|--------------|-------------------|
| tr | Q6JBK8 | Q6JBK8_ZEAMP | YYGRGPLQISWNNYNYG |
| tr | B8QUZ2 | B8QUZ2_ZEAMP | YYGRGPLQISWNNYNYG |
| tr | B8QUV3 | B8QUV3_ZEAMP | YYGRGPLQISWNNYNYG |
| tr | B8QUZ8 | B8QUZ8_ZEAMP | YYGRGPLQISWNNYNYG |
| tr | B8QUV0 | B8QUV0_ZEAMP | YYGRGPLQISWNNYNYG |
| tr | B8QV00 | B8QV00_ZEAMP | YYGRGPLQISWNNYNYG |
| tr | B8QUX4 | B8QUX4_ZEAMP | YYGRGPLQISWNNYNYG |
| tr | B8QUT8 | B8QUT8_ZEAMP | YYGRGPLQISWNNYNYG |
| tr | B8QUY0 | B8QUY0_ZEAMP | YYGRGPLQISWNNYNYG |
| tr | B8QUZ3 | B8QUZ3_ZEAMP | YYGRGPLQISWNNYNYG |
| tr | B8QUY5 | B8QUY5_ZEAMP | YYGRGPLQISWNNYNYG |
| tr | B8QV01 | B8QV01_ZEAMP | YYGRGPLQISWNNYNYG |
| tr | B8QUX0 | B8QUX0_ZEAMP | YYGRGPLQISWNNYNYG |
| tr | B8QUY3 | B8QUY3_ZEAMP | YYGRGPLQISWNNYNYG |
| tr | Q6JBK4 | Q6JBK4_ZEAMP | YYGRGPLQISWNNYNYG |
| tr | B6TEL0 | B6TEL0_MAIZE | YYGRGPLQISWNNYNYG |
| tr | B8QUV9 | B8QUV9_ZEAMP | YYGRGPLQISWNNYNYG |
| tr | B8QUW0 | B8QUW0_ZEAMP | YYGRGPLQISWNNYNYG |
| tr | B8QUW9 | B8QUW9_ZEAMP | YYGRGPLQISWNNYNYG |
| tr | B8QUW4 | B8QUW4_ZEAMP | YYGRGPLQISWNNYNYG |
| tr | D0EM57 | D0EM57_MAIZE | YYGRGPLQISWNNYNYG |
| tr | Q6JBK6 | Q6JBK6_ZEAMP | YYGRGPLQISWNNYNYG |
| tr | Q6JBL1 | Q6JBL1_ZEAMP | YYGRGPLQISWNNYNYG |
| tr | Q6JBL0 | Q6JBL0_ZEAMP | YYGRGPLQISWNNYNYG |
| tr | Q6JBK7 | Q6JBK7_ZEAMP | YYGRGPLQISWNNYNYG |
| tr | Q6JBL4 | Q6JBL4_ZEAMP | YYGRGPLQISWNNYNYG |
| tr | Q6JBK9 | Q6JBK9_ZEAMP | YYGRGPLQISWNNYNYG |
| tr | Q6JBK1 | Q6JBK1_ZEADI | YYGRGPLQISWNNYNYG |
| tr | Q6JBK0 | Q6JBK0_ZEADI | YYGRGPLQISWNNYNYG |
| tr | Q6JBL5 | Q6JBL5_ZEAMP | YYGRGPLQISWNNYNYG |
| tr | Q6JBL3 | Q6JBL3_ZEAMP | YYGRGPLQISWNNYNYG |
| tr | B4FTS6 | B4FTS6_MAIZE | YYGRGPLQISWNNYNYG |
| tr | Q6JBL2 | Q6JBL2_ZEAMP | YYGRGPLQISWNNYNYG |
| tr | Q6JBK3 | Q6JBK3_ZEAMP | YYGRGPLQISWNNYNYG |
| tr | Q6JBL6 | Q6JBL6_TRIDA | YYGRGPLQISWNNYNYG |
| tr | A9XB16 | A9XB16_SACOF | YYGRGPLQISWNNYNYG |
| tr | A9XAV3 | A9XAV3_SACOF | YYGRGPLQISWNNYNYG |
| tr | A9XB14 | A9XB14_SACOF | YYGRGPLQISWNNYNYG |
| tr | Q94EL5 | Q94EL5_SACOF | YYGRGPLQISWNNYNYG |
| tr | Q3HWG5 | Q3HWG5_SORHL | YYGRGPLQISWNNYNYG |
| tr | Q94EL3 | Q94EL3_SORHL | YYGRGPLQISWNNYNYG |
| tr | Q3HWG6 | Q3HWG6_SORHL | YYGRGPLQISWNNYNYG |
| tr | Q3HWG7 | Q3HWG7_SORHL | YYGRGPLQISWNNYNYG |
| tr | C5YBE8 | C5YBE8_SORBI | YYGRGPLQISWNNYNYG |
| tr | C5YBE9 | C5YBE9_SORBI | YYGRGPLQISWNNYNYG |
| tr | Q93WT2 | Q93WT2_SORBI | YYGRGPLQISWNNYNYG |
| tr | Q93WT1 | Q93WT1_SORBI | YYGRGPLQISWNNYNYG |
| tr | Q94EL4 | Q94EL4_SORBI | YYGRGPLQISWNNYNYG |
| tr | Q941I5 | Q941I5_SORBI | YYGRGPLKISWDYNYG  |
| tr | Q6JBQ2 | Q6JBQ2_ZEAMP | YYGRGPLQISWNNYNYG |
| tr | B8QV71 | B8QV71_ZEAMP | YYGRGPLQISWNNYNYG |
| tr | B8QV49 | B8QV49_ZEAMP | YYGRGPLQISWNNYNYG |
| tr | B8QV22 | B8QV22_ZEAMP | YYGRGPLQISWNNYNYG |
| tr | B8QV52 | B8QV52_ZEAMP | YYGRGPLQISWNNYNYG |
| tr | Q6JBQ3 | Q6JBQ3_ZEAMP | YYGRGPLQISWNNYNYG |
| tr | Q6JBQ5 | Q6JBQ5_ZEAMP | YYGRGPLQISWNNYNYG |
| tr | Q6JBQ7 | Q6JBQ7_ZEAMP | YYGRGPLQISWNNYNYG |
| tr | Q6JBQ1 | Q6JBQ1_ZEAMP | YYGRGPLQISWNNYNYG |
| tr | Q6JBQ9 | Q6JBQ9_ZEAMP | YYGRGPLQISWNNYNYG |
| tr | B8QV62 | B8QV62_ZEAMP | YYGRGPLQISWNNYNYG |
| tr | B8QV66 | B8QV66_ZEAMP | YYGRGPLQISWNNYNYG |
| tr | B8QV48 | B8QV48_ZEAMP | YYGRGPLQISWNNYNYG |
| tr | B8QV63 | B8QV63_ZEAMP | YYGRGPLQISWNNYNYG |
| tr | B8QV29 | B8QV29_ZEAMP | YYGRGPLQISWNNYNYG |
| tr | B8QV69 | B8QV69_ZEAMP | YYGRGPLQISWNNYNYG |
| tr | B8QV57 | B8QV57_ZEAMP | YYGRGPLQISWNNYNYG |
| tr | Q6JBP2 | Q6JBP2_ZEADI | YYGRGPLQISWNNYNYG |
| tr | B8QV61 | B8QV61_ZEAMP | YYGRGPLQISWNNYNYG |
| tr | B8QV56 | B8QV56_ZEAMP | YYGRGPLQISWNNYNYG |
| tr | Q6JBQ6 | Q6JBQ6_ZEAMP | YYGRGPLQISWNNYNYG |
| tr | B8QV26 | B8QV26_ZEAMP | YYGRGPLQISWNNYNYG |
| tr | B8QV03 | B8QV03_ZEAMP | YYGRGPLQISWNNYNYG |
| tr | B8QV04 | B8QV04_ZEAMP | YYGRGPLQISWNNYNYG |
| tr | B8QV08 | B8QV08_ZEAMP | YYGRGPLQISWNNYNYG |
| tr | B8QV41 | B8QV41_ZEAMP | YYGRGPLQISWNNYNYG |
| tr | B8QV06 | B8QV06_ZEAMP | YYGRGPLQISWNNYNYG |
| tr | B8QV12 | B8QV12_ZEAMP | YYGRGPLQISWNNYNYG |



|    |        |              |                  |
|----|--------|--------------|------------------|
| tr | B8QV09 | B8QV09_ZEAMP | YYGRGPLQISWNNYNG |
| tr | B8QV53 | B8QV53_ZEAMP | YYGRGPLQISWNNYNG |
| tr | B8QV35 | B8QV35_ZEAMP | YYGRGPLQISWNNYNG |
| tr | C0P451 | C0P451_MAIZE | YYGRGPLQISWNNYNG |
| tr | Q6JBP8 | Q6JBP8_ZEAMP | YYGRGPLQISWNNYNG |
| tr | B8QV28 | B8QV28_ZEAMP | YYGRGPLQISWNNYNG |
| tr | Q6JBP7 | Q6JBP7_ZEADI | YYGRGPLQISWNNYNG |
| tr | Q6JBQ4 | Q6JBQ4_ZEAMP | YYGRGPLQISWNNYNG |
| tr | Q6JBQ0 | Q6JBQ0_ZEAMP | YYGRGPLQISWNNYNG |
| tr | B8QV18 | B8QV18_ZEAMP | YYGRGPLQISWNNYNG |
| tr | B8QV65 | B8QV65_ZEAMP | YYGRGPLQISWNNYNG |
| tr | B8QV14 | B8QV14_ZEAMP | YYGRGPLQISWNNYNG |
| tr | B8QV47 | B8QV47_ZEAMP | YYGRGPLQISWNNYNG |
| tr | B8QV74 | B8QV74_ZEAMP | YYGRGPLQISWNNYNG |
| tr | B8QV19 | B8QV19_ZEAMP | YYGRGPLQISWNNYNG |
| tr | Q6JBP9 | Q6JBP9_ZEAMP | YYGRGPLQISWNNYNG |
| tr | Q6JBP5 | Q6JBP5_ZEADI | YYGRGPLQISWNNYNG |
| tr | B8QV58 | B8QV58_ZEAMP | YYGRGPLQISWNNYNG |
| tr | B8QV68 | B8QV68_ZEAMP | YYGRGPLQISWNNYNG |
| tr | B8QV73 | B8QV73_ZEAMP | YYGRGPLQISWNNYNG |
| tr | B8QV67 | B8QV67_ZEAMP | YYGRGPLQISWNNYNG |
| tr | Q6JBQ8 | Q6JBQ8_ZEAMP | YYGRGPLQISWNNYNG |
| tr | B8QV42 | B8QV42_ZEAMP | YYGRGPLQISWNNYNG |
| tr | B8QV46 | B8QV46_ZEAMP | YYGRGPLQISWNNYNG |
| tr | Q6JBR1 | Q6JBR1_ZEAMP | YYGRGPLQISWNNYNG |
| tr | B8QV34 | B8QV34_ZEAMP | YYGRGPLQISWNNYNG |
| tr | B8QV37 | B8QV37_ZEAMP | YYGRGPLQISWNNYNG |
| tr | Q6JBP3 | Q6JBP3_ZEADI | YYGRGPLQISWNNYNG |
| tr | B8QV24 | B8QV24_ZEAMP | YYGRGPLQISWNNYNG |
| tr | B8QV05 | B8QV05_ZEAMP | YYGRGPLQISWNNYNG |
| tr | B8QV64 | B8QV64_ZEAMP | YYGRGPLQISWNNYNG |
| tr | B8QV32 | B8QV32_ZEAMP | YYGRGPLQISWNNYNG |
| tr | Q6JBR2 | Q6JBR2_TRIDA | YYGRGPLQISWNNYNG |
| tr | C5YBF0 | C5YBF0_SORBI | YYGRGPLQISWNNYNG |
| tr | C5XJT5 | C5XJT5_SORBI | YYGRGPLQLSWNNYNG |
| tr | C0PKN5 | C0PKN5_MAIZE | YYGRGPLQVSWNNYNG |
| tr | C5YBF1 | C5YBF1_SORBI | YYGRGPLQISWNNYNG |
| tr | C5YBE7 | C5YBE7_SORBI | YYGRGPLQISWNNYNG |
| tr | C5YBE6 | C5YBE6_SORBI | YYGRGPLQISWNNYNG |
| tr | B6SZA3 | B6SZA3_MAIZE | YYGRGPLQISWNNYNG |
| tr | B8ARC6 | B8ARC6_ORYSI | YYGRGPLQISWNNYNG |
| tr | A0B9Y6 | A0B9Y6_ORYSA | YYGRGPLQISWNNYNG |
| tr | C6F3C7 | C6F3C7_ORYGR | YYGRGPLQISWNNYNG |
| tr | Q7GC32 | Q7GC32_ORYSI | YYGRGPLQISWNNYNG |
| tr | Q25AB8 | Q25AB8_ORYSA | YYGRGPLQISWNNYNG |
| tr | C5XX83 | C5XX83_SORBI | YYGRGPLQISWNNYNG |
| tr | B6TT00 | B6TT00_MAIZE | YYGRGPLQISWNNYNG |
| tr | A2X6Z9 | A2X6Z9_ORYSI | YYGRGPLQISWNNYNG |
| tr | D1MJ99 | D1MJ99_9ROSI | YYGRGPLQLTWNYYNG |
| tr | O82547 | O82547_CITSI | YYGRGPIQLTGNGNYG |
| tr | A7Y7L3 | A7Y7L3_PRUDU | -YGRGPLQLTWNYYNG |
| tr | Q9XEN3 | Q9XEN3_WHEAT | YYGRGPLQLTWNYYNG |
| tr | Q9XEN6 | Q9XEN6_WHEAT | YYGRGPLQLSWNNYNG |
| tr | Q7M1Q9 | Q7M1Q9_PHYAM | YYGRGPLQLSWNNYNG |
| tr | C1K2E8 | C1K2E8_ELAOL | YFGRGPLQLSWNNYNG |
| tr | A0A3A1 | A0A3A1_ARTAN | YYGRGPIQLSWNNYNG |
| tr | D0QU15 | D0QU15_LACSA | YYGRGPIQLSWNNYNG |
| tr | B9IQS7 | B9IQS7_POPTR | YYGRGPIQLSWNNYNG |
| tr | B9N605 | B9N605_POPTR | YYGRGPIQLSWNNYNG |
| tr | B9VQ34 | B9VQ34_PYRPY | YYGRGPIQLSWNNYNG |
| tr | O23248 | O23248_ARATH | YYGRGPIQLSWNNYNG |
| tr | Q9M2U5 | Q9M2U5_ARATH | YYGRGPIQLSWNNYNG |
| tr | D1HU25 | D1HU25_VITVI | YYGRGPIQLSWNNYNG |
| tr | A5BSD0 | A5BSD0_VITVI | YYGRGPIQLSWNNYNG |
| tr | C6TK83 | C6TK83_SOYBN | YYGRGPIQLTWNYYNG |
| tr | Q43686 | Q43686_VIGUN | YT-VVPIQLSWNNYNG |
| tr | C6T397 | C6T397_SOYBN | YYGRGPIQLSWNNYNG |
| tr | C6T7J9 | C6T7J9_SOYBN | YYGRGPIQLSWNNYNG |
| tr | Q6RV28 | Q6RV28_MEDTR | YYGRGPIQLSWNNYNG |
| tr | B8Y647 | B8Y647_MEDSA | YYGRGPIQLSWNNYNG |
| tr | A1IJ67 | A1IJ67_TOBAC | YYGRGPIQLSWNNYNG |
| tr | Q96409 | Q96409_DAUCA | YFGRGPLQLTWNYYNI |
| tr | Q7XAF6 | Q7XAF6_DAUCA | YFGRGPLQLTWNYYNI |
| tr | Q96408 | Q96408_DAUCA | YFGRGPLQLTWNYYNI |
| tr | Q96411 | Q96411_DAUCA | YFGRGPLQLTWNYYNI |
| tr | Q96410 | Q96410_DAUCA | YFGRGPLQLTWNYYNI |
| tr | B9T8H9 | B9T8H9_RICCO | YYGRGPIQLTWNYYNG |

|    |        |              |                   |
|----|--------|--------------|-------------------|
| tr | D1HU30 | D1HU30_VITVI | YYGRGPLQISWNNYNG  |
| tr | A5C2S9 | A5C2S9_VITVI | YYGRGPLQISWNNYNG  |
| tr | D1HU29 | D1HU29_VITVI | YYGRGPIQISWNNYNG  |
| tr | A5BSD2 | A5BSD2_VITVI | YYGRGPIQLSWNNYNG  |
| tr | D1HU35 | D1HU35_VITVI | YYGRGPIQLSWNNYNG  |
| tr | A5AJB3 | A5AJB3_VITVI | YYGRGPIQLSWNNYNG  |
| tr | Q7XB39 | Q7XB39_VITVI | YYGRGPIQLSWNNYNG  |
| tr | A5BKN8 | A5BKN8_VITVI | YYGRGPIQLSWNNYNG  |
| tr | D1HU23 | D1HU23_VITVI | YYGRGPIQLSWNNYNG  |
| tr | A5AS02 | A5AS02_VITVI | YYGRGPIQLSWNNYNG  |
| tr | D1HU28 | D1HU28_VITVI | YYGRGPLQITWNNFYNG |
| tr | A5BCX7 | A5BCX7_VITVI | YYGRGPLQITWNNFYNG |
| tr | A5BSD1 | A5BSD1_VITVI | YYGRGPIQISWNNYNG  |
| tr | D1HU27 | D1HU27_VITVI | YYGRGPIQLSWNNYNG  |
| tr | Q710B9 | Q710B9_ALNGL | YYGRGPFQLSWNNYNG  |
| tr | D1HU32 | D1HU32_VITVI | YYGRGPIQITWNNYNG  |
| tr | B9IQS9 | B9IQS9_POPTR | YYGRGPLQLSWNNYNG  |
| tr | A9PH35 | A9PH35_POPTR | YYGRGPLQLSWNNYNG  |
| tr | B9IQT0 | B9IQT0_POPTR | YHGRGPIQLSWNNYNG  |
| tr | B9N604 | B9N604_POPTR | YHGRGPLQISWNNFYNG |
| tr | B9IQS8 | B9IQS8_POPTR | YFGRGPLQLTWNFYNG  |
| tr | B9PF44 | B9PF44_POPTR | YFGRGPLQLTWNFYNG  |
| tr | B9SX44 | B9SX44_RICCO | YFGRGPIQLTWNFYNG  |
| tr | Q7X9F8 | Q7X9F8_9FABA | YYGRGPLQITWNNYNG  |
| tr | Q43150 | Q43150_SAMNI | YFGRGPLQLSWNNYNG  |
| tr | Q43151 | Q43151_SAMNI | YHGRGPLQLSWNNYNG  |
| tr | O23804 | O23804_9CARY | YYGRGPIQITWNNYNG  |
| tr | O23803 | O23803_9CARY | YYGRGPIQITWNNYNG  |
| tr | O23806 | O23806_9CARY | YYGRGPIQITWNNYNG  |
| tr | O23805 | O23805_9CARY | YYGRGPLQLTWNFYNG  |
| tr | Q9XFW7 | Q9XFW7_BETVU | YYGRGPLQITWNNYNI  |
| tr | A9ZMK1 | A9ZMK1_NEPAL | YYGRGPIQISWNNYNG  |
| tr | B0FZ27 | B0FZ27_9ROSI | YYGRGPLQLTWNFYNG  |
| tr | Q7XAU6 | Q7XAU6_VITVI | YYGRGPLQLTWNFYNG  |
| tr | O24530 | O24530_VITVI | YYGRGPLQLTWNFYNG  |
| tr | B0FZ26 | B0FZ26_9ROSI | YYGRGPLQLTWNFYNG  |
| tr | O24531 | O24531_VITVI | YYGRGPLQLTWNFYNG  |
| tr | A5AK36 | A5AK36_VITVI | YYGRGPLQLTWNFYNG  |
| tr | D1HU34 | D1HU34_VITVI | YYGRGPLQISWNNYNG  |
| tr | Q3HUM0 | Q3HUM0_LINUS | YYGRGPLQLTWNFYNQ  |
| tr | Q852P9 | Q852P9_9LILI | YFGRGPMQLSWNNYNI  |
| tr | Q94C47 | Q94C47_BRANA | YYGRGAIQLSWNNYNG  |
| tr | Q43391 | Q43391_BRANA | YYGRGAIQLSWNNYNG  |
| tr | A5JVZ1 | A5JVZ1_BRAJU | YYGRGAIQLSWNNYNG  |
| tr | O24603 | O24603_ARATH | YYGRGAIQLSWNNYNG  |
| tr | O04881 | O04881_LINUS | YYGRGPLQLTWNFYNQ  |
| tr | C0PRG2 | C0PRG2_PICSI | YHGRGPLQLSWNNYNG  |
| tr | A9NSX6 | A9NSX6_PICSI | YHGRGPLQLSWNNYNG  |
| tr | A9NP56 | A9NP56_PICSI | YHGRGPLQLSWNNYNG  |
| tr | A9NQV7 | A9NQV7_PICSI | YHGRGPLQLSWNNYNG  |
| tr | Q4VSV1 | Q4VSV1_PICAB | YHGRGPLQISWNNYNG  |
| tr | C3VP99 | C3VP99_PSEMZ | YHGRGPLQLSWNNYNG  |
| tr | C3VPA0 | C3VPA0_PSEMZ | YHGRGPLQLSWNNYNG  |
| tr | Q6WSR8 | Q6WSR8_PICAB | YHGRGPLQLSWNNYNG  |
| tr | C0JR29 | C0JR29_PICAB | YHGRGPLQLSWNNYNG  |
| tr | C0JR28 | C0JR28_PICAB | YHGRGPLQLSWNNYNG  |
| tr | Q40838 | Q40838_PICGL | YHGRGPLQLSWNNYNG  |
| tr | A9P2F9 | A9P2F9_PICSI | YHGRGPLQLSWNNYNG  |
| tr | Q6WSR9 | Q6WSR9_PICAB | YHGRGPLQLSWNNYNG  |
| tr | Q6WSS1 | Q6WSS1_PICAB | YHGRGPLQLSWNNYNG  |
| tr | Q6E6N0 | Q6E6N0_PICAB | YHGRGPLQLSWNNYNG  |
| tr | A9NLX3 | A9NLX3_PICSI | YHGRGPLQLSWNNYNG  |
| tr | Q6WSS0 | Q6WSS0_PICAB | YHGRGPLQLSWNNYNG  |
| tr | B8LPT4 | B8LPT4_PICSI | YHGRGPLQLSWNNYNG  |
| tr | Q596H9 | Q596H9_PINMO | YHGRGPLQLSWNNYNG  |
| tr | Q596H8 | Q596H8_PINMO | YHGRGPLQLSWNNYNG  |
| tr | Q596H7 | Q596H7_PINMO | YHGRGPLQLSWNNYNG  |
| tr | B8LQM1 | B8LQM1_PICSI | YHGRGPLQLSWNNYNG  |
| tr | Q5NTA4 | Q5NTA4_CRYJA | YHGRGPLQLSWNNYNG  |
| tr | A9NRW0 | A9NRW0_PICSI | YYGRGPLQLTGNGNYG  |
| tr | A9NM89 | A9NM89_PICSI | YYGRGPLQLTGNGNYG  |
| tr | A9NM41 | A9NM41_PICSI | YYGRGPLQLTGNYG    |
| tr | A9NTE7 | A9NTE7_PICSI | YYGRGPLQLTGNYG    |
| tr | A9NPI4 | A9NPI4_PICSI | YYGRGPLQLTGNYG    |
| tr | C0PQ29 | C0PQ29_PICSI | YYGRGPLQLTGNYG    |
| tr | B8LNR4 | B8LNR4_PICSI | YYGRGPLQLTGNYG    |
| tr | A9NP79 | A9NP79_PICSI | YYGRGPLQLTWNFYNG  |

|    |        |              |                   |
|----|--------|--------------|-------------------|
| tr | A9NT56 | A9NT56_PICSI | YYGRGFLQLKWNYYNYG |
| tr | B7X6W0 | B7X6W0_BRARC | YFGRGPIQLSWNYYNYG |
| tr | Q05K38 | Q05K38_BRARP | YFGRGPIQLSWNYYNYG |
| tr | A8IXF7 | A8IXF7_BRACM | YFGRGPIQLSWNYYNYG |
| tr | Q9AUF7 | Q9AUF7_BRANA | YFGRGPIQLSWNYYNYG |
| tr | Q9AUF4 | Q9AUF4_BRACM | YFGRGPIQLSWNYYNYG |
| tr | Q9AUF6 | Q9AUF6_BRANA | YFGRGPIQLSWNYYNYG |
| tr | Q9AUF5 | Q9AUF5_BRAOL | YFGRGPIQLSWNYYNYG |
| tr | O24658 | O24658_ARATH | YFGRGPIQLSWNYYNYG |
| tr | O24598 | O24598_ARATH | YHGRGPLLLSWNFNYG  |
| tr | O22841 | O22841_ARATH | YYGRGPIQITWNYNYG  |
| tr | O22842 | O22842_ARATH | YYGRGPIQITWNYNYG  |
| tr | O24654 | O24654_ARATH | YYGRGLLQSIWNEYY   |
| tr | Q9FXB8 | Q9FXB8_ARATH | YYGRGLLQSIKWNEFY  |
| tr | A9RL26 | A9RL26_PHYPA | YYSRGPLQLSWNYYNYK |
| tr | Q4A3V2 | Q4A3V2_PHYPA | YYGRGPIQLSWNYYNYG |
| tr | A9T8R4 | A9T8R4_PHYPA | YYGRGPIQLSWNYYNYG |
| tr | A9ZSX9 | A9ZSX9_9BRYO | YYGRGPIQLSWNYYNYG |
| tr | A9TQE8 | A9TQE8_PHYPA | YFGRGPIQLSWNYYNYG |
| tr | A9S7X6 | A9S7X6_PHYPA | YFGRGPIQLFWNYYNYG |
| tr | A9T7E8 | A9T7E8_PHYPA | YFGRGPLQISWNYYNYG |
| tr | A9SXW7 | A9SXW7_PHYPA | YFGRGPLQLSWNFNYG  |
| tr | A9TSW7 | A9TSW7_PHYPA | YNGRGPLQLSWNYYNYL |
| tr | A9AX07 | A9AX07_HERA2 | YFGRGPIQLSWNYYNYG |
| tr | B3PB24 | B3PB24_CELJU | YYGRGPIQLSWNGNYC  |
| tr | A4BFB3 | A4BFB3_9GAMM | YYGRGPIQLSWNGNYC  |
| tr | Q08TW9 | Q08TW9_STIAU | YYGRGPIQLSWNGNYC  |
| tr | Q08MN3 | Q08MN3_STIAU | YYGRGPIQLSWNGNYC  |
| tr | Q1D3S1 | Q1D3S1_MYXXD | YYGRGPIQLSWNGNYC  |
| tr | Q59I46 | Q59I46_BACCI | YYGRGPIQLSWNYYNYG |
| tr | D3BFR3 | D3BFR3_POLPA | YYGRGPLQLSWNYYNYN |
| tr | D3BIG8 | D3BIG8_POLPA | YYGRGPIQLSWNYYNYA |
| tr | Q9LBM0 | Q9LBM0_BURGA | YYGRGPMQLSWDYYNYK |
| tr | C7PZK0 | C7PZK0_CATAD | YYGRGPLQLSWNFNYI  |
| tr | C7Q712 | C7Q712_CATAD | YYGRGPLQLSWNFNYI  |
| tr | Q9RHK5 | Q9RHK5_9ACTO | YYGRGPVQLSWNFNYK  |
| tr | Q9RHK6 | Q9RHK6_STRLI | YYGRGPVQLSWNFNYK  |
| tr | Q8CK55 | Q8CK55_STRCO | YYGRGPVQLSWNFNYK  |
| tr | Q9Z9M4 | Q9Z9M4_STRCO | YYGRGPVQLSWNFNYK  |
| tr | B8XA70 | B8XA70_9ACTO | YYGRGPVQLSWNFNYK  |
| tr | Q9RHK1 | Q9RHK1_9ACTO | YYGRGPVQLSWNFNYK  |
| tr | A3KIM3 | A3KIM3_STRAM | YYGRGPVQLSWNFNYK  |
| tr | D1XV00 | D1XV00_9ACTO | YYGRGPIQLSWNFNYK  |
| tr | Q9RHU5 | Q9RHU5_STRTL | YYGRGPIQLSWNYYNYK |
| tr | Q9RHU4 | Q9RHU4_STRTL | YYGRGPIQLSWNFNYK  |
| tr | Q75UW8 | Q75UW8_9ACTO | YYGRGPLQLSWNFNYK  |
| tr | Q9X5U3 | Q9X5U3_STRLA | YYGRGPLQISWNFYNYK |
| tr | B5HZA0 | B5HZA0_9ACTO | YYGRGPIQLSWNFNYK  |
| tr | Q9RHK0 | Q9RHK0_STRSQ | YYGRGPIQLSWNFNYK  |
| tr | Q9RHK9 | Q9RHK9_STRCO | YYGRGPIQLSWNFNYK  |
| tr | Q9RHK8 | Q9RHK8_STRLI | YYGRGPIQLSWNFNYK  |
| tr | Q9Z9M6 | Q9Z9M6_STRCO | YYGRGPIQLSWNFNYK  |
| tr | Q9S6T0 | Q9S6T0_STRCO | YYGRGPIQLSWNFNYK  |
| tr | C6KLH5 | C6KLH5_9ACTO | YYGRGPIQLSWNFNYK  |
| tr | Q9RHK7 | Q9RHK7_STRLI | YYGRGPIQLSWNFNYK  |
| tr | A3KJH0 | A3KJH0_STRAM | YYGRGPIQLSWNFNYK  |
| tr | Q9RHJ9 | Q9RHJ9_STRSQ | YYGRGPIQLSWNFNYK  |
| tr | Q9RHK2 | Q9RHK2_9ACTO | YYGRGPIQLSWNFNYK  |
| tr | B3XZQ2 | B3XZQ2_STRCN | YYGRGPIQLSWNFNYK  |
| tr | Q9RHJ7 | Q9RHJ7_STRSQ | YYGRGPIQLSWNFNYK  |
| tr | Q9Z4P2 | Q9Z4P2_STROI | YYGRGPIQLSWNFNYK  |
| tr | C9Z1I5 | C9Z1I5_STRSW | YYGRGPIQLSWNFNYK  |
| tr | Q75UW9 | Q75UW9_9ACTO | YYGRGPIQLSWNFNYK  |
| tr | Q75UX3 | Q75UX3_9ACTO | YYGRGPIQLSWNFNYK  |
| tr | D2AUP6 | D2AUP6_STRRD | YYGRGPIQLSWNFNYK  |
| tr | C6W984 | C6W984_ACTMD | YYGRGPIQLSWNFNYK  |
| tr | Q75UX4 | Q75UX4_AMYOR | YYGRGPIQLSWNFNYK  |
| tr | Q75UW4 | Q75UW4_9ACTO | YYGRGPVQLSWNFNYK  |
| tr | Q75UW6 | Q75UW6_PLARO | YYGRGPIQLSWNFNYK  |
| tr | D1XKV1 | D1XKV1_9ACTO | YYGRGPIQLSWNFNYK  |
| tr | Q9RHK3 | Q9RHK3_9ACTO | YYGRGPIQLSWNFNYK  |
| tr | C9NH04 | C9NH04_9ACTO | YYGRGPIQLSWNFNYK  |
| tr | B8XA68 | B8XA68_9ACTO | YYGRGPIQLSWNFNYK  |
| tr | Q75UW2 | Q75UW2_9MICO | YYGRGPVQLSWNFNYK  |
| tr | Q75UX1 | Q75UX1_KIBAR | YYGRGPIQLSWNFNYK  |
| tr | Q75UW7 | Q75UW7_9ACTO | YYGRGPIQLSWNFNYK  |
| tr | Q75UW1 | Q75UW1_STRHI | YYGRGPIQLSWNFNYK  |

|    |        |              |                   |
|----|--------|--------------|-------------------|
| tr | Q75UX0 | Q75UX0_KIBAR | YYGRGPIQLSWNFNYK  |
| tr | D2Q3H4 | D2Q3H4_9ACTO | YYGRGPIQLSWNFNYK  |
| tr | A4XD26 | A4XD26_SALTO | YYGRGPIQLSWNFNYN  |
| tr | Q75UX2 | Q75UX2_9ACTO | YYGRGPIQLSWNFNYN  |
| tr | B5GNL7 | B5GNL7_STRCL | YYGRGPIQLSWNFNYK  |
| tr | C4DHS0 | C4DHS0_9ACTO | YYGRGPIQ-SWNFNYK  |
| tr | Q764N6 | Q764N6_9ACTO | YYGRGPIQLSWNFNYK  |
| tr | Q9RHJ8 | Q9RHJ8_STRSQ | YYGRGPIQLSWNFNYK  |
| tr | Q845Z9 | Q845Z9_9ACTO | YYGRGPIQLSWNFNYK  |
| tr | Q5J1K1 | Q5J1K1_9ACTO | YYGRGPIQLSWNFNYK  |
| tr | B8XA67 | B8XA67_9ACTO | YYGRGPIQLSWNFNYK  |
| tr | Q75UX7 | Q75UX7_9PSEU | YYGRGPIQLSWNFNYK  |
| tr | Q6V8K4 | Q6V8K4_9ACTO | YYKGPIQLSWNFNYK   |
| tr | Q58GF8 | Q58GF8_STRLN | YYKGPIQLSWNFNYK   |
| tr | B8XA66 | B8XA66_9ACTO | YYKGPIQLSWNFNYK   |
| tr | B8XA65 | B8XA65_9ACTO | YYKGPIQLSWNFNYK   |
| tr | B8XA69 | B8XA69_9ACTO | YYKGPIQLSWNFNYK   |
| tr | B8XA59 | B8XA59_9ACTO | YYKGPIQLSWNFNYK   |
| tr | B8XA61 | B8XA61_9ACTO | YYGRGPIQLSWNFNYK  |
| tr | B8XA60 | B8XA60_9ACTO | YYGRGPIQLSWNFNYK  |
| tr | B8XA62 | B8XA62_9ACTO | YYGRGPIQLSWNFNYK  |
| tr | B8XA58 | B8XA58_9ACTO | YYGRGPIQLSWNFNYR  |
| tr | B8XA63 | B8XA63_9ACTO | YYGRGPIQLSWNFNYK  |
| tr | C1YRN0 | C1YRN0_NOCDA | YYGRGPIQLSWNFNYK  |
| tr | D1WRR0 | D1WRR0_9ACTO | YYGRGPIQLSWNFNYK  |
| tr | B1VMB9 | B1VMB9_STRGG | YYGRGPIQLSWNFNYK  |
| tr | O50152 | O50152_STRGR | YYGRGPIQLSWNFNYK  |
| tr | Q8GI53 | Q8GI53_9ACTO | YYKGPIQLAWNFNYK   |
| tr | Q75UW3 | Q75UW3_9ACTO | YYGRGPIQLSWNFNYK  |
| tr | Q75UW5 | Q75UW5_PLARO | YYGRGPIQPSWNFNYK  |
| tr | D2BDW7 | D2BDW7_STRRD | YYGRGPIQLSWNFNYK  |
| tr | Q75UX6 | Q75UX6_9ACTO | YHGRGPIQLSWNFNYK  |
| tr | B5GNL8 | B5GNL8_STRCL | YYGRGPIQLSWNFNYK  |
| tr | B1VMC0 | B1VMC0_STRGG | YYGRGPIQPSWNFNYK  |
| tr | D1WRQ9 | D1WRQ9_9ACTO | YYGRGPIQPSWNFNYK  |
| tr | D1XKV2 | D1XKV2_9ACTO | YYGRGPIQPSWNFNYK  |
| tr | B8XA64 | B8XA64_9ACTO | YYGRGPIQLSWNFNYK  |
| tr | Q75UW0 | Q75UW0_CELCE | YYGRGPLQLSWNFNYR  |
| tr | A9WKV3 | A9WKV3_RENSM | YYGRGSLQLSWNFNYK  |
| tr | A3Q1W7 | A3Q1W7_MYCSJ | YFGRGPGQLSWNFNYR  |
| tr | A1UIF3 | A1UIF3_MYCSK | YFGRGPGQLSWNFNYR  |
| tr | Q1B6M2 | Q1B6M2_MYCSS | YFGRGPGQLSWNFNYR  |
| tr | Q8STP5 | Q8STP5_ENCCU | YHGRGPIQLSWPDNYK  |
| tr | B7XK35 | B7XK35_ENTBH | YYGRGPIQLSWPDNYK  |
| tr | B0XK59 | B0XK59_CULQU | YYGRGYIQLTWDYNYR  |
| tr | B0XJ44 | B0XJ44_CULQU | YYGRGYIQLTWDYNYR  |
| tr | Q16JP0 | Q16JP0_AEDAE | YYGRGPIQLTWDYNYR  |
| tr | B0WBS6 | B0WBS6_CULQU | YYGRGYIQLTWDYNYR  |
| tr | D2VI28 | D2VI28_NAEGR | YKGRGPIQITGRANYR  |
| tr | D2VMQ6 | D2VMQ6_NAEGR | YKGRGPIQITGRANYR  |
| tr | D2VBA0 | D2VBA0_NAEGR | YKGRGPIQITGRANYR  |
| tr | D2VS08 | D2VS08_NAEGR | YKGRGPIQITGRANYR  |
| tr | Q08VR7 | Q08VR7_STIAU | FKGRGPIQLTGRSNYR  |
| tr | Q1CVS9 | Q1CVS9_MYXXD | YKGRGPIQLTGRANYR  |
| tr | C6BBQ6 | C6BBQ6_RALP1 | FMGRGLIQITGRANYA  |
| tr | B3R5D7 | B3R5D7_CUPTR | FRGRGLIQITGRANYA  |
| tr | B4EG73 | B4EG73_BURCJ | YRGGGLLQITGRYNFR  |
| tr | B2JCY6 | B2JCY6_BURP8 | FCCRGCITQVTGRSNYA |
| tr | Q48J35 | Q48J35_PSE14 | YRGRGLIQITGRANYA  |
| tr | Q4ZSR6 | Q4ZSR6_PSEU2 | YRGRGLIQITGRANYA  |
| tr | Q87Y72 | Q87Y72_PSESM | YRGRGLIQITGRANYA  |
| tr | Q877M3 | Q877M3_PSESM | YRGRGLIQITGRANYA  |
| tr | C3JZM4 | C3JZM4_PSEFS | YRGRGLLQITGRANYA  |
| tr | Q48KG4 | Q48KG4_PSE14 | YRGRGLIQITGRANYA  |
| tr | Q87ZN5 | Q87ZN5_PSESM | YRGRGLIQITGRDNYA  |
| tr | Q48JX1 | Q48JX1_PSE14 | YRGRGLIQITGRANYE  |
| tr | Q4KF46 | Q4KF46_PSEF5 | YRGRGLIQITGRANYE  |
| tr | Q4ZMK9 | Q4ZMK9_PSEU2 | YRGRGLIQITGRNTNYE |
| tr | Q48NQ6 | Q48NQ6_PSE14 | YRGRGLIQITGRANYE  |
| tr | B0KT09 | B0KT09_PSEPG | YRGRGLIQITGRDNYE  |
| tr | B9YYW2 | B9YYW2_9NEIS | YCGRGLIQITGRANYE  |
| tr | Q0EWC5 | Q0EWC5_9PROT | YRGRGLIMVTGHDNYK  |
| tr | B1WPV6 | B1WPV6_CYAA5 | FKGRGLIQLTGRANYR  |
| tr | C4S3X5 | C4S3X5_YERBE | FRGRGLKQITFLDNYE  |
| tr | B1JI29 | B1JI29_YERPY | FRGRGLKQITFLDNYE  |
| tr | C9XYF8 | C9XYF8_CROTZ | YRGRGLKQITFKANYE  |
| tr | Q858F0 | Q858F0_9CAUD | YRGRGLIQITGLNNYR  |

|    |        |              |                  |
|----|--------|--------------|------------------|
| tr | B7UGP7 | B7UGP7_ECO27 | YRGRGLIQITGLNNYR |
| tr | B7NQQ3 | B7NQQ3_ECO7I | YRGRGLIQITGLNNYR |
| tr | A1AE01 | A1AE01_ECOK1 | YRGRGLIQITGLNNYR |
| tr | Q286Y9 | Q286Y9_9CAUD | YRGRGLIQITGLNNYR |
| tr | A6T8B6 | A6T8B6_KLEP7 | YRGRGLIQTTGLNNYR |
| tr | D0YLN0 | D0YLN0_KLEVA | YRGRGLIQTTGLNNYR |
| tr | C4X6X0 | C4X6X0_KLEPN | YRGRGLIQTTGLNNYR |
| tr | C8SZ03 | C8SZ03_KLEPR | YRGRGLIQTTGLNNYR |
| tr | B5NGY0 | B5NGY0_SALET | YRGRGLIQITGLNNYR |
| tr | B5MHX8 | B5MHX8_SALET | YRGRGLIQITGLNNYR |
| tr | A9MSG1 | A9MSG1_SALPB | YRGRGLIQITGLNNYR |
| tr | B5Q9Z2 | B5Q9Z2_SALVI | YRGRGLIQITGLNNYR |
| tr | C8Q937 | C8Q937_9ENTR | YRGRGIIQITGLSNYR |
| tr | A7MLQ6 | A7MLQ6_ENTS8 | YRGRGLIHITGLENYR |
| tr | C9Y1P6 | C9Y1P6_CROTZ | YRGRGLIQITGLENYR |
| tr | B5QY63 | B5QY63_SALEP | YRGRGLLQITGRENYV |
| tr | C1M3H7 | C1M3H7_9ENTR | YRGRGLLQITGRENYA |
| tr | A9N3F1 | A9N3F1_SALPB | YRGRGLIQITGLHNYR |
| tr | B4TRD8 | B4TRD8_SALSV | YRGRGLIQITGLENYT |
| tr | B5CDL1 | B5CDL1_SALET | YRGRGLIQITGLENYT |
| tr | Q8Z7W2 | Q8Z7W2_SALTI | YRGRGLIQITGLENYT |
| tr | A9N4H1 | A9N4H1_SALPB | YRGRGLIQITGLENYT |
| tr | Q8ZQH4 | Q8ZQH4_SALTY | YRGRGLIQITGLENYT |
| tr | Q57Q94 | Q57Q94_SALCH | YRGRGLIQITGLENYT |
| tr | B5PLD3 | B5PLD3_SALET | YRGRGLIQITGLENYT |
| tr | B5FQV2 | B5FQV2_SALDC | YRGRGLIQITGLENYT |
| tr | B6S2Y3 | B6S2Y3_SALDU | YRGRGLIQITGLENYT |
| tr | D0ZLG3 | D0ZLG3_SALT1 | YRGRGLIQITGLENYT |
| tr | C9X7P3 | C9X7P3_SALTD | YRGRGLIQITGLENYT |
| tr | B5N7J2 | B5N7J2_SALET | YRGRGLIQITGLENYT |
| tr | Q8HA86 | Q8HA86_9CAUD | YRGRGLIQITGLENYT |
| tr | B4TNF9 | B4TNF9_SALSV | YRGRGLIQITGLENYT |
| tr | B5CCN5 | B5CCN5_SALET | YRGRGLIQITGLENYT |
| tr | B4TMP0 | B4TMP0_SALSV | YRGRGLIQITGLHNYR |
| tr | B5CBX4 | B5CBX4_SALET | YRGRGLIQITGLHNYR |
| tr | Q06WC1 | Q06WC1_SALTY | YRGRGLIQITGLHNYR |
| tr | C4TVC5 | C4TVC5_YERKR | YRGRGLIQITGLDNYR |
| tr | D2TB12 | D2TB12_ERWP6 | YRGRGLIQVTGLENYR |
| tr | D0FSC0 | D0FSC0_ERWPY | YRGRGLIQVTGLENYR |
| tr | A9ML97 | A9ML97_SALAR | YRGRGLLQITGRENYT |
| tr | Q207V1 | Q207V1_HARVE | FRGRGAMQLTHRSNYA |
| tr | Q207V0 | Q207V0_HARVE | FRGRGAMQLTHRSNYA |
| tr | D2TE20 | D2TE20_ERWP6 | YIGRGLLHLTGRENYQ |
| tr | C8ZLP4 | C8ZLP4_ERWPY | YIGRGLLHLTGRENYQ |
| tr | D2TE64 | D2TE64_ERWP6 | YIGRGLLHLTGRENYQ |
| tr | C8ZLP8 | C8ZLP8_ERWPY | YIGRGLLHLTGRENYQ |
| tr | Q2SLQ7 | Q2SLQ7_HAHCH | FKGRGLIQLTGRSNYS |
| tr | Q82VB8 | Q82VB8_NITEU | YKGRGLIQLTGRANYR |
| tr | Q5ZGC9 | Q5ZGC9_9CAUD | FKGRGYIQVTGRYNYT |
| tr | Q2G4P1 | Q2G4P1_NOVAD | YLGRGPIQITGRANYR |
| tr | D2BY21 | D2BY21_DICD5 | YRGRGLIQLTGRDNYR |
| tr | C6CH56 | C6CH56_DICZE | YRGRGLIQLTGRDNYR |
| tr | C6C827 | C6C827_DICDC | FRGRGLIQLTGRDNYR |
| tr | C4RAI8 | C4RAI8_9PROT | YRGRGLIQVTGKTNYA |
| tr | A4TVX0 | A4TVX0_9PROT | YRGRGLIQVTGKANYA |
| tr | Q4KA35 | Q4KA35_PSEF5 | YRGRGLIQLTGANNYR |
| tr | B5LAX5 | B5LAX5_9BURK | YRGRGLIQLTGRDNYE |
| tr | C6MHH7 | C6MHH7_9PROT | YRGRGYIQLTGKDNYS |
| tr | A4NUP3 | A4NUP3_HAEIN | YRGRGLIQITGKDNYA |
| tr | Q56AZ0 | Q56AZ0_TREHY | YRGRGIIQLTGKNNYK |
| tr | B9USB1 | B9USB1_BRAHW | YRGRGIIQLTGKNNYK |
| tr | B9USE1 | B9USE1_9SPIR | YRGRGIIQLTGKNNYE |
| tr | C1QF51 | C1QF51_9SPIR | YRGRGIIQLTGKNNYK |
| tr | C1QEUS | C1QEUS_9SPIR | YRGRGIIQLTGKNNYK |
| tr | C1QGI4 | C1QGI4_9SPIR | YRGRGIIQLTGKNNYK |
| tr | Q8PQ62 | Q8PQ62_XANAC | YRGRGYIQLTGKDQYR |
| tr | Q3BYD6 | Q3BYD6_XANC5 | YRGRGYIQLTGKDQYR |
| tr | B2FJG3 | B2FJG3_STRMK | YHGRGYLPLVGKENYE |
| tr | B4SNB5 | B4SNB5_STRM5 | YHGRGYLPLVGKENYE |
| tr | C1D6N5 | C1D6N5_LARHH | YRGRGFIQLTGRDNYA |
| tr | Q5GX30 | Q5GX30_XANOR | YKKGIIQLTWKGTYN  |
| tr | B2SI96 | B2SI96_XANOP | YKKGIIQLTWKGTYN  |
| tr | A4XNG6 | A4XNG6_PSEMY | YKGRGLIQLTWSAYQ  |
| tr | B8IAI0 | B8IAI0_METNO | FYGRGDVQLTHERNYI |
| tr | B8IIX3 | B8IIX3_METNO | FYGRGDVQLTHERNYI |
| tr | B9JVZ7 | B9JVZ7_AGRVS | WLGRGYVQLTHKGNYN |
| tr | D2PVE1 | D2PVE1_9ACTO | YGGRYIQLTGDFNYG  |

tr|B0VVF0|B0VVF0\_ACIBS YKGRGLMQITYKKNYE
