# Supplementary material for: Structural Relationships in the Lysozyme Superfamily: Significant Evidence for Glycoside Hydrolase Signature Motifs
Source: PubMed Central journal article supplement (PMC2976769; doi:10.1371/journal.pone.0015388), 2010-11-09
Supplement: pone.0015388.s003.pdf [file pone.0015388.s003.pdf]

Figure S2. Multiple alignment of GH22c motif sequences.

|    |        |              | 10             |
|----|--------|--------------|----------------|
| tr | B8YK79 | B8YK79_CHICK | .... .... ...  |
| tr | B8YK77 | B8YK77_GALLA | DYGILQINSRWWC  |
| tr | B8YK75 | B8YK75_GALSO | DYGILQINSRWWC  |
| tr | B8YJN9 | B8YJN9_CHICK | DSGILQINSRWWC  |
| tr | B8YJP1 | B8YJP1_CHICK | DSGILQINSRWWC  |
| tr | B8YJT7 | B8YJT7_CHICK | DFGILQINSRWWC  |
| tr | B8YK73 | B8YK73_GALVA | HYGILQINSRWWC  |
| tr | B8YK69 | B8YK69_BAMTH | HYGILQINSRWWC  |
| tr | B8YK71 | B8YK71_FRAPO | YYGIFQINSRWWC  |
| tr | P84496 | P84496_ALOAE | DYGILQINSRWWC  |
| tr | Q6GPX0 | Q6GPX0_XENLA | DYGILQINSRWWC  |
| tr | B5XA65 | B5XA65_SALSA | DYGIFQINSRYWC  |
| tr | Q9DD55 | Q9DD55_SALSA | DYGIFQINSRYWC  |
| tr | C1BZN5 | C1BZN5_ESOLU | DYGIFQINSRWWC  |
| tr | A7M773 | A7M773_9PLEU | DYGIFQINSRWWC  |
| tr | B3VHW3 | B3VHW3_PSEMX | DYGIFQINSRWWC  |
| tr | Q4RZF0 | Q4RZF0_TETNG | DYGIFQINSRWWC  |
| tr | C1K9I4 | C1K9I4_PERFV | DYGIFQINSRWWC  |
| tr | Q2PZ29 | Q2PZ29_SOLSE | DYGIFQINSRYWC  |
| tr | B0LVZ3 | B0LVZ3_SOLSE | DYGIFQMSRYWC   |
| tr | B5LV45 | B5LV45_OREAU | DFGIFQINSYWWC  |
| tr | B5LV44 | B5LV44_OREAU | DFGIFQINNRWWC  |
| tr | B5AE24 | B5AE24_OREAU | DFGIFQINSRWWC  |
| tr | C3V6M9 | C3V6M9_ORYLA | DYGIFQINSYWWC  |
| tr | A4Z8Q3 | A4Z8Q3_SHEEP | DYGIFQINSHWWC  |
| tr | C9EJ83 | C9EJ83_SHEEP | DYGIFQINSHWWC  |
| tr | D0ETJ4 | D0ETJ4_CAPHI | DYGIFQINSHWWC  |
| tr | A4Z8Q1 | A4Z8Q1_BUBBU | DYGIFQINSRWWC  |
| tr | B2R4C5 | B2R4C5_HUMAN | DYGIFQINSRYWC  |
| tr | Q0MRP5 | Q0MRP5_9CETA | DYGIFQINSRWWC  |
| tr | B8R1K4 | B8R1K4_BOSMU | DYGIFQINSRWWC  |
| tr | A9NJ73 | A9NJ73_FELCA | DYGIFQINSRYWC  |
| tr | Q6PDV1 | Q6PDV1_RAT   | DYGIFQINSRYWC  |
| tr | Q29575 | Q29575_PIG   | DYGIFQINSRYWC  |
| tr | A5HKM9 | A5HKM9_BUBBU | DYGIFQINSKWWC  |
| tr | A4Z8Q2 | A4Z8Q2_BUBBU | DYGIFQINSKWWC  |
| tr | D2HIV6 | D2HIV6_AILME | DYGIFQINSRYWC  |
| tr | B2RYD4 | B2RYD4_RAT   | DYGIFQINSRYWC  |
| tr | Q8BM26 | Q8BM26_MOUSE | SYGIFQINSRFWC  |
| tr | Q8BM27 | Q8BM27_MOUSE | SYGIFQINSRFWC  |
| tr | Q9D249 | Q9D249_MOUSE | SYGIFQINSRFWC  |
| tr | Q5M8G0 | Q5M8G0_XENTR | EYGIFQINSYWWC  |
| tr | Q6DIU1 | Q6DIU1_XENTR | EYGIFQINSYWWC  |
| tr | Q90WE9 | Q90WE9_RANCA | EYGIFQINSYWWC  |
| tr | C1C526 | C1C526_RANCA | DYGIFQINSKWWC  |
| tr | B5KFT9 | B5KFT9_TAEGU | DYGIFQINSKYWC  |
| tr | D2H7P7 | D2H7P7_AILME | EYGIFQLSSAWWC  |
| tr | D2HWT4 | D2HWT4_AILME | DYGIFQLNNKWWC  |
| tr | A8MZ93 | A8MZ93_HUMAN | NNGIFQINSRRWC  |
| tr | B6VH81 | B6VH81_CEBAP | NNGIFQINSRRWC  |
| tr | B4DYD1 | B4DYD1_HUMAN | NNGIFQINSRRWC  |
| tr | D2GU68 | D2GU68_AILME | NNGIFQINSRKWC  |
| tr | D2HCM0 | D2HCM0_AILME | DYGIFQINSFTWC  |
| tr | Q24JW2 | Q24JW2_DANRE | DYGIFQINSFKWC  |
| tr | Q90YS5 | Q90YS5_DANRE | DYGIFQINSFKWC  |
| tr | Q9IBG5 | Q9IBG5_CYPCA | DYGIFQINSFKWC  |
| tr | B5AC76 | B5AC76_CTEID | DYGIFQINSFKWC  |
| tr | A2A9H7 | A2A9H7_MOUSE | DYGIFQINSRYWC  |
| tr | Q4R8K7 | Q4R8K7_MACFA | DYGLFQINGHYWC  |
| tr | Q78ID0 | Q78ID0_MOUSE | GFGLFQIRDNEWC  |
| tr | D2I648 | D2I648_AILME | GYGLFQIRSHHEWC |
| tr | Q86Q32 | Q86Q32_DERVA | DYGIFQINNGYWC  |
| tr | Q86L96 | Q86L96_DERAN | DYGIFQINNGYWC  |
| tr | B7P0W4 | B7P0W4_IXOSC | DFGIFQINNGYWC  |
| tr | Q685C9 | Q685C9_9SCOR | EYGIFQISSRYWC  |
| tr | Q685C4 | Q685C4_9SCOR | EYGIFQISSRYWC  |
| tr | Q685B2 | Q685B2_9SCOR | EYGIFQISSRYWC  |
| tr | Q685B3 | Q685B3_9SCOR | EYGIFQISSRYWG  |
| tr | Q685B0 | Q685B0_9SCOR | EYGIFQISSRYWC  |
| tr | Q685A2 | Q685A2_9SCOR | EYGIFQISSRYWC  |
| tr | Q685F2 | Q685F2_9SCOR | EYGIFQISSRYWC  |
| tr | Q685F3 | Q685F3_9SCOR | EYGIFQISSRYWC  |

|    |        |              |                |
|----|--------|--------------|----------------|
| tr | Q685C8 | Q685C8_9SCOR | EYGIFQISSRYWC  |
| tr | Q685E0 | Q685E0_9SCOR | EYGIFQISSRYWC  |
| tr | Q685F9 | Q685F9_9SCOR | EYGIFQISSRYWC  |
| tr | Q685F6 | Q685F6_9SCOR | EYGIFQISSRYWC  |
| tr | Q685E5 | Q685E5_9SCOR | EYGIFQISSRYWC  |
| tr | Q685D9 | Q685D9_9SCOR | EYGIFQISSRYWC  |
| tr | Q685E1 | Q685E1_9SCOR | EYGIFQISSRYWC  |
| tr | Q685B1 | Q685B1_9SCOR | EYGISQISSRYWG  |
| tr | Q685A1 | Q685A1_9SCOR | EYGISQISSRYRC  |
| tr | Q685G3 | Q685G3_BUTEU | EYGIFQISSRYWC  |
| tr | Q685A9 | Q685A9_9SCOR | EYGIFQISSRYWC  |
| tr | Q685A7 | Q685A7_9SCOR | EYGIFQISSRYWC  |
| tr | Q685C1 | Q685C1_9SCOR | EYGIFQISSRYWC  |
| tr | Q685E2 | Q685E2_9SCOR | EYGIFQINNRYWC  |
| tr | Q685E7 | Q685E7_9SCOR | EYGIFQTSTRYWW  |
| tr | Q685E4 | Q685E4_9SCOR | EYGRFQISNRYWC  |
| tr | Q685F1 | Q685F1_9SCOR | EYGIFQISSRYWC  |
| tr | Q685F0 | Q685F0_9SCOR | EYGIFQISSRYWW  |
| tr | Q685C2 | Q685C2_9SCOR | EYGIFQISSRYWC  |
| tr | Q685G2 | Q685G2_9SCOR | EYGIFQISSRYWC  |
| tr | Q685A4 | Q685A4_9SCOR | KYGIFQISSRYWC  |
| tr | Q6IUF5 | Q6IUF5_BRABE | DHGLFQINDYYWC  |
| tr | Q86QP2 | Q86QP2_BRABE | DHELFPQINDYYWC |
| tr | C3ZXI8 | C3ZXI8_BRAFL | DHGLFQINDHYWC  |
| tr | C3ZFG3 | C3ZFG3_BRAFL | DYGLFPQINGYYWC |
| tr | Q86M91 | Q86M91_ANOST | DYGIFQINNKFWC  |
| tr | B2MV88 | B2MV88_9DIPT | DYGIFQINNKYWC  |
| tr | O02418 | O02418_ANODA | DYGLFQINNKYWC  |
| tr | Q6GU92 | Q6GU92_ANOGA | DYGIFQINNAYWC  |
| tr | B6DDP3 | B6DDP3_ANODA | DYGLFQINNRYWC  |
| tr | B6DDP4 | B6DDP4_ANODA | DYGLFQINNRYWC  |
| tr | Q7QJ81 | Q7QJ81_ANOGA | DYGIFQINNYWC   |
| tr | Q6GU91 | Q6GU91_ANOGA | DYGIFQINNYWC   |
| tr | A0NBE9 | A0NBE9_ANOGA | YYGLFQLQSAYHC  |
| tr | Q4ZJA6 | Q4ZJA6_ANOGA | YYGLFQLQSAYHC  |
| tr | A9LN32 | A9LN32_RHOPR | DYGLFQINDHIWC  |
| tr | Q26363 | Q26363_MANSE | DYGLFQINDKYWC  |
| tr | Q9TWY1 | Q9TWY1_MANSE | DYGLFQINDKYWC  |
| tr | Q8I808 | Q8I808_AGRCO | DYGLFQINDKYWC  |
| tr | Q2L7D2 | Q2L7D2_ANTPE | DYGLFQINDKYWC  |
| tr | Q6QEJ9 | Q6QEJ9_9NEOP | DYGLFQINDKYWC  |
| tr | Q9GNL4 | Q9GNL4_SAMCR | DYGLFQINDKYWC  |
| tr | B8YI23 | B8YI23_HELZE | DYGLYQINDKYWC  |
| tr | Q19R28 | Q19R28_HELAM | DYGLYQINDKYWC  |
| tr | O96862 | O96862_HELVI | DYGLYQINDKYWC  |
| tr | B6DZS0 | B6DZS0_SPOLT | DYGLFQINDKYWC  |
| tr | Q86FK1 | Q86FK1_SPOEX | DYGLFQINDKYWC  |
| tr | Q6QMF0 | Q6QMF0_PSEIC | DYGLFQINDKYWC  |
| tr | Q68KS6 | Q68KS6_9NEOP | DYGLFQINDKYWC  |
| tr | A9P5Q4 | A9P5Q4_9NEOP | DYGLFQINDKYWC  |
| tr | A9XXB6 | A9XXB6_TRINI | DYGLFQINDNIWC  |
| tr | B0WEH8 | B0WEH8_CULQU | DWGLFQINDRYWC  |
| tr | B0WEH9 | B0WEH9_CULQU | DWGLFQINDRYWC  |
| tr | B8RJ76 | B8RJ76_CULTA | DWGLFQINDRYWC  |
| tr | Q8T3T7 | Q8T3T7_AEDAL | DWGLFQINDRYWC  |
| tr | Q9GRF3 | Q9GRF3_AEDAE | DWGLFQINDRYWC  |
| tr | Q672J4 | Q672J4_AEDAE | DWGLFQINDRYWC  |
| tr | Q16V63 | Q16V63_AEDAE | DYGLFQINNKYWC  |
| tr | Q8T9V5 | Q8T9V5_AEDAE | DYGLFQINNKYWC  |
| tr | Q5MIY9 | Q5MIY9_AEDAL | DYGLFQINNKYWC  |
| tr | A0FIV6 | A0FIV6_9DIPT | DYGLFQINNRYWC  |
| tr | D1FPY3 | D1FPY3_9DIPT | DYGLFQINSKYWC  |
| tr | D1FPX6 | D1FPX6_9DIPT | DYGLFQINSKYWC  |
| tr | B5M0V6 | B5M0V6_SIMVI | DYGLFQINSKYWC  |
| tr | Q16TW8 | Q16TW8_AEDAE | SYGIFQINSKQWC  |
| tr | Q1DGZ3 | Q1DGZ3_AEDAE | SYGIFQINSKQWC  |
| tr | B0WUD1 | B0WUD1_CULQU | SYGIFQINSKEWC  |
| tr | Q7PT23 | Q7PT23_ANOGA | NYGIFQINSKEWC  |
| tr | Q7QJA6 | Q7QJA6_ANOGA | NYGIFQINSKTWC  |
| tr | B0WUD2 | B0WUD2_CULQU | SYGIFQINSKEWC  |
| tr | A1BW46 | A1BW46_DROPS | SYGLFQINSKNWC  |
| tr | A1BW47 | A1BW47_DROMI | SYGLFQINSKNWC  |
| tr | A1BW65 | A1BW65_DROMI | SYGLFQINSKNWC  |
| tr | A1BW45 | A1BW45_DROAI | SYGLFQINSKNWC  |
| tr | Q2PQQ7 | Q2PQQ7_GLOMM | SYGLFQINSKNWC  |
| tr | A5A143 | A5A143_BOMMO | SYGLFQINNKDWC  |
| tr | A5A142 | A5A142_ANTMY | YYGLFQIGS-EWC  |

|    |        |              |               |
|----|--------|--------------|---------------|
| tr | D1KRL0 | D1KRL0_MANSE | YYGLFQIGS-EWC |
| tr | B4GWI7 | B4GWI7_DROPE | SLGLFQINSR-YC |
| tr | Q29I82 | Q29I82_DROPS | SLGLFQINSR-YC |
| tr | Q9W4C2 | Q9W4C2_DROME | NYGLFQINGR-FC |
| tr | B4I0P3 | B4I0P3_DROSE | NYGLFQINGR-FC |
| tr | B3NV44 | B3NV44_DROER | SYGLFQINGR-FC |
| tr | B4PZQ1 | B4PZQ1_DROYA | NYGLFQINGR-FC |
| tr | B4L4L9 | B4L4L9_DROMO | NYGLFQINER-YC |
| tr | B4M2J4 | B4M2J4_DROVI | SYGLFQINGR-YC |
| tr | B4JN62 | B4JN62_DROGR | NYGLFQINTR-FC |
| tr | B4MUJ9 | B4MUJ9_DROWI | NYGLFQINGR-YC |
| tr | A1BWC8 | A1BWC8_DROMI | NYGLFQINSKDYC |
| tr | A1BWC3 | A1BWC3_DROMI | NYGLFQINSKDYC |
| tr | A1BWC2 | A1BWC2_DROPS | NYGLFQINSKDYC |
| tr | B5E170 | B5E170_DROPS | NYGLFQINSKDYC |
| tr | B4GGZ3 | B4GGZ3_DROPE | NYGLFQINSKDYC |
| tr | B3MIT6 | B3MIT6_DROAN | NYGLFQINSKNYC |
| tr | C5WLP0 | C5WLP0_DROME | NYGLFQINSKDYC |
| tr | C0HBU0 | C0HBU0_DROME | NYGLFQINSKDYC |
| tr | A1ZBX6 | A1ZBX6_DROME | NYGLFQINSKDYC |
| tr | B4HQN0 | B4HQN0_DROSE | NYGLFQINSKDYC |
| tr | B4QF38 | B4QF38_DROSI | NYGLFQINSKDYC |
| tr | B3NJW6 | B3NJW6_DROER | NYGLFQINNRDYC |
| tr | B4PA33 | B4PA33_DROYA | NYGLFQINSKDYC |
| tr | B4MPJ4 | B4MPJ4_DROWI | NYGLFQINSKDYC |
| tr | B4ME97 | B4ME97_DROVI | NYGLFQINSRDYC |
| tr | A0SLC3 | A0SLC3_MAYDE | SYGLFQINSKDYC |
| tr | Q95V66 | Q95V66_LITVA | DYGIFQINNKYWC |
| tr | C0IXV4 | C0IXV4_LITST | DYGIFQINNKYWC |
| tr | Q8IT75 | Q8IT75_PENMO | DYGIFQINNKYWC |
| tr | Q86D81 | Q86D81_MACRS | DYGIFQINNKHWC |
| tr | Q86D80 | Q86D80_MACNP | DYGIFQINNKYWC |
| tr | A7XUF7 | A7XUF7_PENMO | DYGIFQINNKYWC |
| tr | Q4KY21 | Q4KY21_FENCH | DYGIFQINNKYWC |
| tr | C1IIX1 | C1IIX1_FENME | DYGIFQINNKYWC |
| tr | C8CK83 | C8CK83_FENIN | DYGIFQINNKYWC |
| tr | Q8I7X3 | Q8I7X3_PENSE | DYGIFQINNKYWC |
| tr | Q86SC1 | Q86SC1_PENJP | DYGIFQINNKYWC |
| tr | Q8WSQ8 | Q8WSQ8_PENJP | DYGIFQINNKYWC |
| tr | B9VQ21 | B9VQ21_9EUCA | DYGLFQLNKKYWC |
| tr | Q177Z3 | Q177Z3_AEDAE | YHGMFQLSDEYWC |
| tr | B0W3Z5 | B0W3Z5_CULQU | YHGMFQLSDEYWC |
| tr | Q7Q6R2 | Q7Q6R2_ANOGA | YHGMFQLSDEYWC |
| tr | C8C411 | C8C411_TRICA | DHGLFQISQIYWC |
| tr | C8C412 | C8C412_TRICA | DHGLFQISQIYWC |
| tr | B6RQP3 | B6RQP3_SITZE | DYGILQISEKFWC |
| tr | Q9VSA5 | Q9VSA5_DROME | DHGLFQISDLYWC |
| tr | B4QKX1 | B4QKX1_DROSI | DHGLFQISDLFWC |
| tr | B4HIV3 | B4HIV3_DROSE | DHGLFQISDLYWC |
| tr | B4PCB0 | B4PCB0_DROYA | DHGLFQISDLYWC |
| tr | B3M961 | B3M961_DROAN | DHGLFQISDLFWC |
| tr | B4H299 | B4H299_DROPE | DHGLFQISDLYWC |
| tr | B5DR06 | B5DR06_DROPS | DHGLFQISDLYWC |
| tr | B4KWW1 | B4KWW1_DROMO | DHGLFQISDLYWC |
| tr | B4LH11 | B4LH11_DROVI | DHGLFQISDLYWC |
| tr | B4IWP9 | B4IWP9_DROGR | DHGLFQISDLYWC |
| tr | B4MY10 | B4MY10_DROWI | DHGLFQISDLYWC |
| tr | D2KMR3 | D2KMR3_BOMMO | TRPTTAITAKYWT |
| tr | A5H9H9 | A5H9H9_9NEOP | DYGLFQINDRYWC |
| tr | Q8IAD0 | Q8IAD0_9NEOP | DYGLFQINDRYWC |
| tr | Q8IAD1 | Q8IAD1_9NEOP | DYGLFQINDRYWC |
| tr | A5H9H7 | A5H9H7_9NEOP | DYGLFQINDRYWC |
| tr | B4J5J4 | B4J5J4_DROGR | DWGLFQINDRYWC |
| tr | B4LKY2 | B4LKY2_DROVI | DWGLFQINDRYWC |
| tr | B4KPK0 | B4KPK0_DROMO | DWGLFQINDRYWC |
| tr | B3NPV1 | B3NPV1_DROER | DWGLFQINDRYWC |
| tr | B4P6B7 | B4P6B7_DROYA | DWGLFQINDRYWC |
| tr | B4QHH6 | B4QHH6_DROSI | DWGLFQINDRYWC |
| tr | A1ZAB8 | A1ZAB8_DROME | DWGLFQINDRYWC |
| tr | B4HST5 | B4HST5_DROSE | DWGLFQINDRYWC |
| tr | B3MH65 | B3MH65_DROAN | DWGLFQINDRYWC |
| tr | Q28Z62 | Q28Z62_DROPS | DWGLFQINDRYWC |
| tr | B4GI84 | B4GI84_DROPE | DWGLFQINDRYWC |
| tr | B4L917 | B4L917_DROMO | DYGIFQINDRYWC |
| tr | B4L918 | B4L918_DROMO | DYGIFQINDRYWC |
| tr | B4LCC7 | B4LCC7_DROVI | DYGIFQINDRYWC |
| tr | A4V9X3 | A4V9X3_DROSI | DYGIFQINDLYWC |

|    |        |              |                |
|----|--------|--------------|----------------|
| tr | A4V9X4 | A4V9X4_DROSI | DYGIFQINDLYWC  |
| tr | A4V9X6 | A4V9X6_DROSI | DYGIFQINDLYWC  |
| tr | A4V9X5 | A4V9X5_DROSI | DYGIFQINDLYWC  |
| tr | B4QLX5 | B4QLX5_DROSI | DYGVFQINDLYWC  |
| tr | B3NJF2 | B3NJF2_DROER | DYGIFQINDLYWC  |
| tr | B4PCR4 | B4PCR4_DROYA | DYGIFQINDLYWC  |
| tr | B4LCC9 | B4LCC9_DROVI | DYGIFQINNNYYWC |
| tr | B4LCC8 | B4LCC8_DROVI | DYGIFQINDYYWC  |
| tr | B4L916 | B4L916_DROMO | DYGIFQINNNYYWC |
| tr | B4L913 | B4L913_DROMO | DYGIFQINNNYYWC |
| tr | B4LCC5 | B4LCC5_DROVI | DYGIFQINNNYYWC |
| tr | B5DR84 | B5DR84_DROPS | DYGIFQINDYYWC  |
| tr | B4H5I6 | B4H5I6_DROPE | DYGIFQINDYYWC  |
| tr | B5DR88 | B5DR88_DROPS | DYGIFQINDYYWC  |
| tr | B5DR91 | B5DR91_DROPS | DYGIFQINDYYWC  |
| tr | B4H5I8 | B4H5I8_DROPE | DYGIFQINDYYWC  |
| tr | B4PD47 | B4PD47_DROYA | DYGIFQINDYYWC  |
| tr | B4PD44 | B4PD44_DROYA | DYGIFQINDYYWC  |
| tr | B4HVP1 | B4HVP1_DROSE | DYGIFQINDYYWC  |
| tr | B3NJF7 | B3NJF7_DROER | DYGIFQINDYYWC  |
| tr | B4QLX9 | B4QLX9_DROSI | DYGIFQINDYYWC  |
| tr | B4HVP0 | B4HVP0_DROSE | DYGIFQINDYYWC  |
| tr | B4PD45 | B4PD45_DROYA | DYGIFQINDYYWC  |
| tr | B4MXX7 | B4MXX7_DROWI | DYGIFQINDYYWC  |
| tr | B5DR89 | B5DR89_DROPS | DYGIFQINDYYWC  |
| tr | B4H5I7 | B4H5I7_DROPE | DYGIFQINDYYWC  |
| tr | B5DR85 | B5DR85_DROPS | DYGIFQINDYYWC  |
| tr | B5DR87 | B5DR87_DROPS | DYGIFQINDYYWC  |
| tr | B4H5I9 | B4H5I9_DROPE | DYGIFQINDYYWC  |
| tr | B4LCD1 | B4LCD1_DROVI | DYGIFQINDLYWC  |
| tr | B4PD49 | B4PD49_DROYA | DYGIFQINDLYWC  |
| tr | Q6XHI6 | Q6XHI6_DROYA | DYGIFQINDLYWC  |
| tr | B4NSY7 | B4NSY7_DROSI | DYGIFQINDLYWC  |
| tr | B3DMZ0 | B3DMZ0_DROME | DYGIFQINDLYWC  |
| tr | Q29EU6 | Q29EU6_DROPS | DYGIFQINDLYWC  |
| tr | B4MXY1 | B4MXY1_DROWI | DYGIFQINDLYWC  |
| tr | B3M543 | B3M543_DROAN | DYGIFQINDLYWC  |
| tr | B3M549 | B3M549_DROAN | DYGIFQINNNYYWC |
| tr | B3M548 | B3M548_DROAN | DYGIFQINNNYYWC |
| tr | B3M545 | B3M545_DROAN | DYGIFQINNNYYWC |
| tr | B5DR81 | B5DR81_DROPS | DYGIFQINNNYYWC |
| tr | B3NJG0 | B3NJG0_DROER | DYGIFQINNKYWC  |
| tr | B4PD48 | B4PD48_DROYA | DYGIFQINNKYWC  |
| tr | B3M544 | B3M544_DROAN | DYGIFQINNKYWC  |
| tr | B4H5J1 | B4H5J1_DROPE | DYGIFQINDYYWC  |
| tr | B5DR82 | B5DR82_DROPS | AYGIFQINDYYWC  |
| tr | B3M554 | B3M554_DROAN | DYGLFQINDRYWC  |
| tr | B3GQR5 | B3GQR5_MUSDO | DYGIFQINNNYYWC |
| tr | Q7YT17 | Q7YT17_MUSDO | DYGIFQINNNYYWC |
| tr | B4J6D4 | B4J6D4_DROGR | DHGIFQINDRIWC  |
| tr | B5DR83 | B5DR83_DROPS | NYGIFQISNEYWC  |
| tr | B4JLE8 | B4JLE8_DROGR | NYGIFQIGN-HWC  |
| tr | B4J6D3 | B4J6D3_DROGR | NYGIFQISDGWWC  |
| tr | A1Z9D5 | A1Z9D5_DROME | DYGLFQISDRYWC  |
| tr | Q2TPW4 | Q2TPW4_TRIBS | DNGLFQINDRYWC  |
| tr | Q7YZS5 | Q7YZS5_TRIF  | DNGLFQINDRFWC  |
| tr | A9LN31 | A9LN31_RHOPR | DNGLFQINDRIWC  |
| tr | A9X7P1 | A9X7P1_TRIF  | YYGLFQISDRYWC  |
| tr | B7PQG4 | B7PQG4_IXOSC | DHGIFQINDKHWC  |
| tr | D2HWT5 | D2HWT5_AILME | EYGLFQINNKFWC  |
