# Supplementary material for: Structural Relationships in the Lysozyme Superfamily: Significant Evidence for Glycoside Hydrolase Signature Motifs
Source: PubMed Central journal article supplement (PMC2976769; doi:10.1371/journal.pone.0015388), 2010-11-09
Supplement: pone.0015388.s004.pdf [file pone.0015388.s004.pdf]

**Figure S3. Multiple alignment of GH22i motif sequences.**

|    |        | .... ....    |           |
|----|--------|--------------|-----------|
| tr | Q8IU26 | Q8IU26_VENPH | LSCGYFQIK |
| tr | C8CBP0 | C8CBP0_VENPH | LSCGYFQIK |
| tr | Q9BLE0 | Q9BLE0_VENPH | LSCGYFQIK |
| tr | Q8ITT7 | Q8ITT7_9BIVA | LSCGYFQIK |
| tr | Q8ITT8 | Q8ITT8_9BIVA | LSCGYFQIK |
| tr | Q8ITU2 | Q8ITU2_MYTED | LSCGPFQIK |
| tr | Q8ITT9 | Q8ITT9_MYTGA | LSCGPFQIK |
| tr | D0QS77 | D0QS77_9BIVA | LSCGPFQIK |
| tr | Q8ITU0 | Q8ITU0_9BIVA | LSCGPFQIK |
| tr | Q8ITU1 | Q8ITU1_9BIVA | LSCGPFQIK |
| tr | D0QSI1 | D0QSI1_9BIVA | LSCGPFQIK |
| tr | D0QS81 | D0QS81_9BIVA | LSCGPFQIK |
| tr | D0QSJ1 | D0QSJ1_9BIVA | LSCGPFQIK |
| tr | D0QS79 | D0QS79_9BIVA | LSCGPFQIK |
| tr | D0QS75 | D0QS75_9BIVA | LSCGPFQIK |
| tr | D0QSB7 | D0QSB7_9BIVA | LSCGPFQIK |
| tr | D0QSA8 | D0QSA8_9BIVA | LSCGPFQIK |
| tr | D0QS86 | D0QS86_9BIVA | LSCGPFQIK |
| tr | A5LHX1 | A5LHX1_MYTGA | NSCGYMQIK |
| tr | Q2XPU8 | Q2XPU8_MYTED | NSCGYMQIK |
| tr | Q9BI29 | Q9BI29_CHLIS | DSCGYFQLK |
| tr | Q9TP22 | Q9TP22_CHLIS | DSCGYFQLK |
| tr | A3KDX2 | A3KDX2_CRAGI | ESCGYYQIK |
| tr | A9CPZ8 | A9CPZ8_CRAGI | ESCGYYQIK |
| tr | A3KDX3 | A3KDX3_CRAGI | YSCGYFQIK |
| tr | O76358 | O76358_CAEEL | LSCGYFQIK |
| tr | O76357 | O76357_CAEEL | LSCGYFQIK |
| tr | Q19698 | Q19698_CAEEL | LSCGYFQIK |
| tr | A8XC38 | A8XC38_CAEER | LSCGYFQIK |
| tr | Q9GYQ2 | Q9GYQ2_CAEEL | IGCGYFRLN |
| tr | A8XRH9 | A8XRH9_CAEER | IGCGYFRLN |
| tr | A8PY35 | A8PY35_BRUMA | YGCGYFRLN |
| tr | Q0ZME1 | Q0ZME1_9ANNE | LSCGPFQIK |
| tr | Q25091 | Q25091_HIRME | LSCGPFQIK |
| tr | Q6TP50 | Q6TP50_ASTRU | LSCGPFQIK |
| tr | A0MT08 | A0MT08_STIJA | LSCGPFQIK |
| tr | C3ZBZ4 | C3ZBZ4_BRAFL | LSCGPFQIQ |
| tr | C3ZBZ3 | C3ZBZ3_BRAFL | LSCGPFQIQ |
| tr | C3YM12 | C3YM12_BRAFL | DSCGPFQIK |
