# Supplementary material for: Structural Relationships in the Lysozyme Superfamily: Significant Evidence for Glycoside Hydrolase Signature Motifs
Source: PubMed Central journal article supplement (PMC2976769; doi:10.1371/journal.pone.0015388), 2010-11-09
Supplement: pone.0015388.s005.pdf [file pone.0015388.s005.pdf]

Figure S4. Multiple alignment of GH23 motif sequences.

| tr | Accession | Protein Name | Sequence          |
|----|-----------|--------------|-------------------|
|    |           |              | 10<br>..... ..... |
| tr | P84503    | P84503_ANSCY | NGFGLMQVDK        |
| tr | P84504    | P84504_RHEAM | NGFGLMQVDR        |
| tr | Q5FW09    | Q5FW09_XENTR | NAFGLMQVDK        |
| tr | Q5XK71    | Q5XK71_XENLA | NAFGLMQVDK        |
| tr | Q1M163    | Q1M163_GADMO | NGFGLMQVDK        |
| tr | B9TU22    | B9TU22_GADMO | NGFGLMQVDK        |
| tr | A6PYF4    | A6PYF4_GADMO | NGFGLMQVDK        |
| tr | A6PYF3    | A6PYF3_GADMO | IGFGLMQVDK        |
| tr | C1BHT6    | C1BHT6_ONCMY | NGFGLMQVDK        |
| tr | C1BHK0    | C1BHK0_ONCMY | NGFGLMQVDK        |
| tr | C1BGU6    | C1BGU6_ONCMY | NGFGLMQVDK        |
| tr | A6PZ97    | A6PZ97_SALSA | KGFGLMQVDK        |
| tr | B5XET9    | B5XET9_SALSA | KGFGLMQVDK        |
| tr | B5XAN4    | B5XAN4_SALSA | KGFGLMQVDK        |
| tr | B5XCN8    | B5XCN8_SALSA | KGFGLMQVDK        |
| tr | B5XDU9    | B5XDU9_SALSA | KGFGLMQVDK        |
| tr | B5X9P5    | B5X9P5_SALSA | KGFGLMQVDK        |
| tr | B5XA96    | B5XA96_SALSA | KGFGLMQVDK        |
| tr | C1BW35    | C1BW35_ESOLU | NGFGLMQVDK        |
| tr | Q0KFS4    | Q0KFS4_SALSA | KGFGLMQVDK        |
| tr | C1BL43    | C1BL43_OSMMO | NGFGLMQVDK        |
| tr | Q6DH80    | Q6DH80_DANRE | NGFGLMQVDK        |
| tr | B5AFK7    | B5AFK7_LABRO | NGFGLMQVDK        |
| tr | A3KP47    | A3KP47_DANRE | NGFGLMQVDK        |
| tr | B5AC75    | B5AC75_CTEID | YAFGLMQIDK        |
| tr | C3XXG2    | C3XXG2_BRAFL | NGYGLMQVDI        |
| tr | C3XXG0    | C3XXG0_BRAFL | NGYGLMQVDI        |
| tr | C3YR54    | C3YR54_BRAFL | NGFGLMQIDR        |
| tr | B3RIZ1    | B3RIZ1_TRIAD | NGYGLMQVDK        |
| tr | Q08NK4    | Q08NK4_STIAU | NGFGLMQVDK        |
| tr | A8D9Q3    | A8D9Q3_LARCR | NAWGLMQVDV        |
| tr | A8D9Q7    | A8D9Q7_LARCR | NAWGLMQVDV        |
| tr | Q5XU03    | Q5XU03_SINCH | NGWGLMQVDV        |
| tr | A7M774    | A7M774_9PLEU | NAWGLMQVDV        |
| tr | B1B725    | B1B725_SOLSE | NAWGLMQVDV        |
| tr | A8D3J6    | A8D3J6_LATCA | KAWGLMQVDV        |
| tr | B2RFG5    | B2RFG5_SPAAU | NAWGLMQVDV        |
| tr | Q4RZR7    | Q4RZR7_TETNG | KAWGLMQVDV        |
| tr | B9ELT2    | B9ELT2_SALSA | KAFGLMQIDT        |
| tr | C1BF55    | C1BF55_ONCMY | RGFGLMQVDV        |
| tr | C1BQ11    | C1BQ11_9MAXI | NAFGLMQVDK        |
| tr | C1BHE7    | C1BHE7_ONCMY | NAFGLMQVDK        |
| tr | B2ZSY1    | B2ZSY1_ANAPL | NAFGLMQVDK        |
| tr | C3YYL0    | C3YYL0_BRAFL | NGFGLMQVDK        |
| tr | D2HDC7    | D2HDC7_AILME | LKFGLMQLDK        |
| tr | A5PJT9    | A5PJT9_BOVIN | LKFGLMQLDK        |
| tr | C9J4J0    | C9J4J0_HUMAN | LKFGLMQLDK        |
| tr | C9JBA4    | C9JBA4_HUMAN | LKFGLMQLDK        |
| tr | Q496G2    | Q496G2_HUMAN | LKFGLMQLDK        |
| tr | D2HDC6    | D2HDC6_AILME | DGIQVQVQ-DP       |
| tr | Q53RV9    | Q53RV9_HUMAN | DRTSMVQ-DP        |
| tr | Q0VE18    | Q0VE18_MOUSE | SGLQMVK-ET        |
| tr | Q4T499    | Q4T499_TETNG | NCFGLMQINK        |
| tr | Q7YXC1    | Q7YXC1_OIKDI | YGWGLMQVDR        |
| tr | Q7YXC2    | Q7YXC2_OIKDI | YGWGLMQVDR        |
| tr | Q7YXC3    | Q7YXC3_OIKDI | YGWGLMQVDR        |
| tr | Q075V3    | Q075V3_9BIVA | HAYGILQCDI        |
| tr | Q2HNY7    | Q2HNY7_AEQIR | HAYGILQCDI        |
| tr | C4TJC8    | C4TJC8_CRAGI | NAYGIMQCDV        |
| tr | C3ZH25    | C3ZH25_BRAFL | NGWGLMQVDK        |
| tr | B0TES1    | B0TES1_HELMI | -ARGLMQLMP        |
| tr | C0GKJ2    | C0GKJ2_9FIRM | -ALGLMQLMP        |
| tr | C5VQ07    | C5VQ07_CLOBO | -AIGLMQLTP        |
| tr | A7VZ93    | A7VZ93_9CLOT | -ARGLMQIMP        |
| tr | D2Z7E0    | D2Z7E0_9BACT | -ASGLMQLMP        |
| tr | Q0VPM5    | Q0VPM5_ALCBS | -AQGLMQLMP        |
| tr | B4X1W0    | B4X1W0_9GAMM | -AQGLMQLMP        |
| tr | Q2BMQ9    | Q2BMQ9_9GAMM | -AQGLMQLMP        |
| tr | B5JXR2    | B5JXR2_9GAMM | -AQGLMQLMP        |
| tr | Q1ZHF2    | Q1ZHF2_9GAMM | -AMGLMQLMP        |
| tr | C8NDD9    | C8NDD9_9GAMM | -AMGLMQLMP        |
| tr | C7LR87    | C7LR87_DESBD | -AQGLMQIMP        |

|    |        |              |            |
|----|--------|--------------|------------|
| tr | B8DI65 | B8DI65_LISMH | -ATGLMQLMA |
| tr | Q92DT7 | Q92DT7_LISIN | -ATGLMQLMY |
| tr | Q722I0 | Q722I0_LISMF | -ATGLMQLMY |
| tr | C1L0Z8 | C1L0Z8_LISMC | -ATGLMQLMY |
| tr | C8K7E6 | C8K7E6_LISMO | -ATGLMQLMY |
| tr | Q4ELS3 | Q4ELS3_LISMO | -ATGLMQLMY |
| tr | Q4EU87 | Q4EU87_LISMO | -ATGLMQLMY |
| tr | D2PAV5 | D2PAV5_LISMO | -ATGLMQLMY |
| tr | D2NZI0 | D2NZI0_LISMO | -ATGLMQLMY |
| tr | C8K9V3 | C8K9V3_LISMO | -ATGLMQLMY |
| tr | C8JY83 | C8JY83_LISMO | -ATGLMQLMY |
| tr | Q8Y925 | Q8Y925_LISMO | -ATGLMQLMY |
| tr | Q8GMY2 | Q8GMY2_LISMO | -ATGLMQLMY |
| tr | A0AGH2 | A0AGH2_LISW6 | -ATGLMQLMY |
| tr | O64046 | O64046_BPSPC | -AMGLMQLMP |
| tr | B1HNX9 | B1HNX9_LYSSC | -AQGLMQLMP |
| tr | A3IFZ4 | A3IFZ4_9BACI | -AQGLMQLMP |
| tr | Q9K900 | Q9K900_BACHD | -ASGLMQLMP |
| tr | Q3AF19 | Q3AF19_CARHZ | -AMGLMQLMP |
| tr | C8W6G7 | C8W6G7_DESAS | -ALGLTQLMP |
| tr | C0QET8 | C0QET8_DESAH | -VRGLMQVTT |
| tr | B8FJF4 | B8FJF4_DESAA | -VKGLMQITR |
| tr | B3QU47 | B3QU47_CHLT3 | -AKGLMQVVP |
| tr | Q11RC3 | Q11RC3_CYTH3 | -ACGLMQVMP |
| tr | Q7NWF6 | Q7NWF6_CHRVO | -ASGLMQLMP |
| tr | C0Z4A8 | C0Z4A8_BREBN | -ARGLLQIMP |
| tr | A7BWV5 | A7BWV5_9GAMM | YGRGLMQIDY |
| tr | Q7VF48 | Q7VF48_HELHP | -AYGLMQVVP |
| tr | C9PJB4 | C9PJB4_VIBFU | -AFGLMQIVP |
| tr | A6D3Q2 | A6D3Q2_9VIBR | -AVGIMQVLP |
| tr | Q1INF2 | Q1INF2_ACIBL | HGVGLVQIDI |
