# Supplementary material for: Structural Relationships in the Lysozyme Superfamily: Significant Evidence for Glycoside Hydrolase Signature Motifs
Source: PubMed Central journal article supplement (PMC2976769; doi:10.1371/journal.pone.0015388), 2010-11-09
Supplement: pone.0015388.s006.pdf [file pone.0015388.s006.pdf]

Figure S5. Multiple alignment of GH24v motif sequences.

|    |        | 10           |                                                              |
|----|--------|--------------|--------------------------------------------------------------|
| tr | Q7M2A4 | Q7M2A4_BPT2  | ..... ..... ..... .                                          |
| tr | Q06EK2 | Q06EK2_BPR32 | IYKDT <b>EG</b> Y <b>Y</b> TIGIGHL                           |
| tr | C3V2B5 | C3V2B5_BPR51 | IYKDT <b>EG</b> Y <b>Y</b> TIGIGHL                           |
| tr | C3V1I9 | C3V1I9_9CAUD | IYKDT <b>EG</b> Y <b>Y</b> TIGIGHL                           |
| tr | Q7Y2B5 | Q7Y2B5_BPR69 | LYKDT <b>EG</b> F <b>W</b> TIGIGHL                           |
| tr | C4MZK9 | C4MZK9_9CAUD | LYKDT <b>EG</b> Y <b>W</b> TIGIGQL                           |
| tr | A8R9C2 | A8R9C2_9CAUD | LYKDT <b>EG</b> Y <b>W</b> TIGIGQL                           |
| tr | Q56EM5 | Q56EM5_9CAUD | VYWD <b>SE</b> GYPTVGIGHL                                    |
| tr | Q6U9G4 | Q6U9G4_9CAUD | VYWD <b>SE</b> GYPTVGIGHL                                    |
| tr | Q19CN7 | Q19CN7_9CAUD | VYWD <b>SE</b> GYPTVGIGHL                                    |
| tr | Q6U979 | Q6U979_9CAUD | VYWD <b>HL</b> GYPTVGIGHL                                    |
| tr | Q56EE1 | Q56EE1_9CAUD | VYWD <b>HL</b> GYPTVGIGHL                                    |
| tr | Q19CF2 | Q19CF2_9CAUD | VYWD <b>HL</b> GYPTIGIGHL                                    |
| tr | Q76YA6 | Q76YA6_9CAUD | VYWD <b>TE</b> GYPTIGIGHL                                    |
| tr | Q8SDG3 | Q8SDG3_9CAUD | WYLD <b>SE</b> GYPTIGIGHL                                    |
| tr | A7XF92 | A7XF92_9CAUD | WYLD <b>SE</b> GYPTIGIGHL                                    |
| tr | C4MYV6 | C4MYV6_9CAUD | WYLD <b>SE</b> GYPTIGIGHL                                    |
| tr | Q76YN5 | Q76YN5_9CAUD | WYLD <b>SE</b> GYPTIGIGHL                                    |
| tr | Q56BJ4 | Q56BJ4_9CAUD | WYYD <b>VK</b> GY-TIGIGHF                                    |
| tr | Q06EH6 | Q06EH6_BPR32 | VYWD <b>TE</b> GYPTIGIGHL                                    |
| tr | C3V1L1 | C3V1L1_9CAUD | VYWD <b>TE</b> GYPTIGIGHL                                    |
| tr | C3V2D8 | C3V2D8_BPR51 | VYWD <b>TE</b> GYPTIGIGHL                                    |
| tr | Q7Y4Y4 | Q7Y4Y4_BPR69 | VYWD <b>HL</b> GYPTVGIGHL                                    |
| tr | C4MZP0 | C4MZP0_9CAUD | VYWD <b>TE</b> GYPTIGIGHL                                    |
| tr | Q5QBY1 | Q5QBY1_9CAUD | VYWD <b>TE</b> GYPTIGIGHL                                    |
| tr | A4G7B2 | A4G7B2_HERAR | AYQ <b>DH</b> LGF <b>W</b> TIGVGIL                           |
| tr | A6T031 | A6T031_JANMA | AYE <b>DH</b> LS <b>F</b> L <b>T</b> IGIGRL                  |
| tr | A9I970 | A9I970_BORPD | AYR <b>DH</b> L <b>G</b> Y <b>L</b> TIGVGRN                  |
| tr | B9CB79 | B9CB79_9BURK | IYVD <b>TV</b> G <b>K</b> V <b>S</b> GGIGRN                  |
| tr | B9BQE8 | B9BQE8_9BURK | IYVD <b>TV</b> G <b>K</b> V <b>S</b> GGIGRN                  |
| tr | B9CGW2 | B9CGW2_9BURK | IYVD <b>TV</b> G <b>K</b> V <b>S</b> GGIGRN                  |
| tr | B9BX46 | B9BX46_9BURK | IYVD <b>TV</b> G <b>K</b> V <b>S</b> GGIGRN                  |
| tr | B9BBE6 | B9BBE6_9BURK | IYID <b>TV</b> G <b>K</b> V <b>S</b> GGIGRN                  |
| tr | A2W8F0 | A2W8F0_9BURK | IYVD <b>TV</b> G <b>K</b> V <b>S</b> GGIGRN                  |
| tr | Q2T018 | Q2T018_BURTA | IYTD <b>TV</b> G <b>K</b> V <b>S</b> GGIGRN                  |
| tr | C5AEP5 | C5AEP5_BURGB | PYVD <b>TV</b> G <b>K</b> I <b>T</b> IGVGRN                  |
| tr | B9TDP0 | B9TDP0_RICCO | PYLD <b>TK</b> GI <b>Q</b> TTAVGHN                           |
| tr | B0VGF1 | B0VGF1_9BACT | PYRC <b>T</b> AG <b>K</b> L <b>T</b> IGIGRN                  |
| tr | B0VF72 | B0VF72_9BACT | PYRC <b>T</b> AG <b>K</b> L <b>T</b> IGIGRN                  |
| tr | Q5N403 | Q5N403_SYNP6 | PYRC <b>T</b> AG <b>R</b> L <b>T</b> IGIGRN                  |
| tr | Q31Q81 | Q31Q81_SYNE7 | PYRC <b>T</b> AG <b>R</b> L <b>T</b> IGIGRN                  |
| tr | A6F0L1 | A6F0L1_9ALTE | PYLD <b>TV</b> G <b>K</b> L <b>T</b> VGYGRN                  |
| tr | A9MK11 | A9MK11_SALAR | PYID <b>AL</b> GYPTVG <b>V</b> G <b>F</b> K                  |
| tr | A8T9J0 | A8T9J0_9VIBR | PYYC <b>SE</b> GYPTIGIG <b>Q</b> K                           |
| tr | Q5G7N2 | Q5G7N2_9CAUD | PYK <b>D</b> SLGYPTIGY <b>G</b> I <b>K</b>                   |
| tr | C8PDP7 | C8PDP7_9PROT | IYK <b>D</b> SLG <b>K</b> ATIGY <b>G</b> F <b>L</b>          |
| tr | C8PIK2 | C8PIK2_9PROT | IYED <b>TR</b> GY <b>K</b> TIGY <b>G</b> F <b>L</b>          |
| tr | C9PG81 | C9PG81_VIBFU | PYRC <b>SN</b> Q <b>K</b> L <b>T</b> IGYGRN                  |
| tr | A9ZHG7 | A9ZHG7_COXBU | LYK <b>D</b> SVG <b>K</b> WTIGYGRN                           |
| tr | A9KG49 | A9KG49_COXBN | LYK <b>D</b> SVS <b>K</b> WTIGYGRN                           |
| tr | B6J707 | B6J707_COXB1 | LYK <b>D</b> SVG <b>K</b> WTIGYGRN                           |
| tr | Q83CS4 | Q83CS4_COXBU | LYK <b>D</b> SVG <b>K</b> WTIGYGRN                           |
| tr | A9NCQ7 | A9NCQ7_COXBR | LYK <b>D</b> SVG <b>K</b> WTIGYGRN                           |
| tr | B6J063 | B6J063_COXB2 | LYK <b>D</b> SVG <b>K</b> WTIGYGRN                           |
| tr | A8EV01 | A8EV01_ARCB4 | VYK <b>C</b> PAG <b>F</b> D <b>T</b> IGYGRN                  |
| tr | C1SGF3 | C1SGF3_9BACT | PYVC <b>P</b> AG <b>K</b> WTIGYGRN                           |
| tr | Q933T0 | Q933T0_HELPY | IYTD <b>K</b> T <b>G</b> H <b>P</b> TIGYGRN                  |
| tr | O25106 | O25106_HELPY | IYTD <b>K</b> T <b>G</b> H <b>P</b> TIGYGRN                  |
| tr | B6JKR4 | B6JKR4_HELP2 | IYTD <b>K</b> T <b>G</b> H <b>P</b> TIGYGRN                  |
| tr | D0JYN5 | D0JYN5_HELP5 | VYAD <b>K</b> T <b>G</b> H <b>P</b> TIGYGRN                  |
| tr | B9XTI9 | B9XTI9_HELPY | IYTD <b>K</b> T <b>G</b> H <b>P</b> TIGYGRN                  |
| tr | A9V884 | A9V884_MONBE | TYVD <b>T</b> T <b>G</b> H <b>K</b> T <b>I</b> CYGFN         |
| tr | A7S7F4 | A7S7F4_NEMVE | MYLD <b>I</b> K <b>G</b> I <b>K</b> TIGVGRN                  |
| tr | Q22BQ6 | Q22BQ6_TETTH | VYLD <b>TK</b> GI <b>P</b> TIGIGFN                           |
| tr | B5QB53 | B5QB53_SALVI | VYK <b>DH</b> L <b>G</b> Y <b>P</b> TIGY <b>G</b> H <b>L</b> |
| tr | A7MG17 | A7MG17_ENTS8 | PYND <b>TE</b> GF <b>L</b> TVGF <b>G</b> H <b>K</b>          |
| tr | A4SN28 | A4SN28_AERS4 | RYK <b>D</b> SLGY <b>W</b> TIGY <b>G</b> H <b>L</b>          |
| tr | Q8H9R6 | Q8H9R6_9CAUD | WYK <b>D</b> SLGY <b>W</b> TGGY <b>G</b> H <b>L</b>          |
| tr | A9J749 | A9J749_9CAUD | WYK <b>D</b> SL <b>G</b> K <b>I</b> TGGY <b>G</b> H <b>L</b> |
| tr | C6DKJ8 | C6DKJ8_PECCP | KYRD <b>T</b> AG <b>K</b> WTIGY <b>G</b> H <b>L</b>          |
| tr | Q8GCR0 | Q8GCR0_PECCC | KYRD <b>T</b> AG <b>K</b> WTIGY <b>G</b> H <b>L</b>          |
| tr | C9XUR2 | C9XUR2_CROTZ | KYQ <b>D</b> AV <b>G</b> K <b>W</b> TIGY <b>G</b> H <b>L</b> |

|    |        |              |                   |
|----|--------|--------------|-------------------|
| tr | C6BJ95 | C6BJ95_RALP1 | TYLDAVGKPTIGYGHL  |
| tr | B2UGR3 | B2UGR3_RALPJ | TYLDAVGKPTIGYGHL  |
| tr | D3F184 | D3F184_ACTN  | PYDDPAGHATVGYGHL  |
| tr | C8N775 | C8N775_9GAMM | MYYDAAGLPTIGVGH   |
| tr | C8NCA4 | C8NCA4_9GAMM | MYLDSAGLPTIGVGH   |
| tr | A3YYR1 | A3YYR1_9SYNE | PRIDSLGNTVIGFNHV  |
| tr | C9MTK8 | C9MTK8_9BACT | PYNDKSGFATIGVGH   |
| tr | C7Z8W0 | C7Z8W0_NECH7 | IYKDAAGYPTVGYGHL  |
| tr | Q2GND9 | Q2GND9_CHAGB | VYNDPAGHPVTVGYGHL |
| tr | C7Z967 | C7Z967_NECH7 | VYIDATGNPTVGYGHL  |
| tr | C5AYQ1 | C5AYQ1_METEA | AYRDSVGVVWTIGIGHT |
| tr | A9W2L1 | A9W2L1_METEP | AYRDSVGVVWTIGIGHT |
| tr | C7CKV4 | C7CKV4_METED | AYRDSVGGWTIGIGHT  |
| tr | B7KTM6 | B7KTM6_METC4 | AYRDSVGVVWTIGIGHT |
| tr | B1ZE94 | B1ZE94_METPB | AYRDSVGVVWTIGIGHT |
| tr | B0UJ17 | B0UJ17_METS4 | AYKDSVGVVWTIGVGT  |
| tr | B5PT00 | B5PT00_SALHA | AYPDSRGIPTIGVGHT  |
| tr | A9MNN1 | A9MNN1_SALAR | AYPDSRGIPTIGVGHT  |
| tr | Q5G8R3 | Q5G8R3_9CAUD | AYPDSRGIPTIGVGHT  |
| tr | Q56117 | Q56117_9CAUD | AYPDSRGIPTIGVGHT  |
| tr | Q5PG10 | Q5PG10_SALPA | AYPDSRGIPTIGVGHT  |
| tr | B5FLT9 | B5FLT9_SALDC | AYPDSRGIPTIGVGHT  |
| tr | B5BDL3 | B5BDL3_SALPK | AYPDSRGIPTIGVGHT  |
| tr | B4A6C6 | B4A6C6_SALNE | AYPDSRGIPTIGVGHT  |
| tr | A8CGF4 | A8CGF4_BPP22 | AYSDSRGIPTIGVGHT  |
| tr | A3VTL8 | A3VTL8_9PROT | VYDDGVGIWTIGYGHT  |
| tr | Q94ML9 | Q94ML9_9CAUD | KAVPTEKHYTIGYGHY  |
| tr | B3VMQ1 | B3VMQ1_BPPH2 | KAVPTEKHYTIGYGHY  |
| tr | B7SSN6 | B7SSN6_BPNF  | KAVPTEKYTYTIGYGHY |
| tr | B4SF16 | B4SF16_PELPB | TYVCPGGKLTIGYGHT  |
| tr | B6SD17 | B6SD17_9VIRU | AYQCSAGRWTIGYGHT  |
| tr | B6SCY8 | B6SCY8_9VIRU | AYQCRAGRWTLYYGHT  |
| tr | Q2NTT9 | Q2NTT9_SODGM | AYQCSADRWTIGYGHT  |
| tr | Q2NTN7 | Q2NTN7_SODGM | AYQCSADRWTIGYGHT  |
| tr | Q6HAD9 | Q6HAD9_9ENTR | AYQCSANVWSIGYGHT  |
| tr | B6VNM2 | B6VNM2_PHOAA | AYQCSANVWTIGYGHT  |
| tr | Q2A096 | Q2A096_9VIRU | AYQCRAGIWTIGYGHT  |
| tr | Q4LBS9 | Q4LBS9_SODGL | AYQCRAGIWTIGYGHT  |
| tr | B9MGZ0 | B9MGZ0_DIAST | PYICPAGYWTIGYGHL  |
| tr | C6NTT6 | C6NTT6_9GAMM | PYVCPAGYWTIGYGHL  |
| tr | A6T1M1 | A6T1M1_JANMA | PYVCPAGFWTIGYGHL  |
| tr | C6XGM6 | C6XGM6_LIBAP | RDIG--GGAWTIGYGHT |
| tr | D1Q094 | D1Q094_9BACT | RDSG--GKPTIGYGHT  |
| tr | C3X1U7 | C3X1U7_OXAFO | AYQDSKGLWTIGYGHT  |
| tr | C4U1T3 | C4U1T3_YERKR | PYQCSAGVWTSIGIGHT |
| tr | C4SNR0 | C4SNR0_YERFR | PYQCSAGVWTSIGIGHT |
| tr | C9XYT3 | C9XYT3_CROTZ | PYQCSAGVWTSIGIGHT |
| tr | B7NIL7 | B7NIL7_ECO7I | PYQCSAGVWTDGIGNT  |
| tr | Q8FJH5 | Q8FJH5_ECOL6 | PYQCSAGVWTDGIGNT  |
| tr | B7UMS0 | B7UMS0_ECO27 | PYQCSAGVWTDGIGNT  |
| tr | B7MYT1 | B7MYT1_ECO81 | PYQCSAGVWTDGIGNT  |
| tr | B5FS42 | B5FS42_SALDC | PYQCSAGVWTDGIGNT  |
| tr | A7ZYD1 | A7ZYD1_ECOHS | PYQCSAGVWTDGIGNT  |
| tr | Q8Z351 | Q8Z351_SALTI | PYQCSAGVWTDGIGNT  |
| tr | B7MJI0 | B7MJI0_ECO45 | PYQCSAGVWTDGIGNT  |
| tr | B1IWU6 | B1IWU6_ECOLC | PYQCSAGVWTDGIGNT  |
| tr | C8QCC9 | C8QCC9_9ENTR | PYQCDAGKWTGIGNT   |
| tr | Q4FSX3 | Q4FSX3_PSYA2 | AYQDTGKVWTIGYGHT  |
| tr | D0BX92 | D0BX92_9GAMM | AYQDTGGVWTIGYGHT  |
| tr | A9INC3 | A9INC3_BART1 | AYKDAIGVWTIGYGHT  |
| tr | Q6G4P4 | Q6G4P4_BARHE | AYKDAIGVWTIGYGHT  |
| tr | A9IPJ6 | A9IPJ6_BART1 | AYKDAIGVWTIGYGHT  |
| tr | C6AD90 | C6AD90_BARGA | AYKDAIGVWTIGYGHT  |
| tr | C6ABV9 | C6ABV9_BARGA | AYKDAIGVWTIGYGHT  |
| tr | A9IY00 | A9IY00_BART1 | AYKDAIGVWTIGYGHT  |
| tr | C6AAE8 | C6AAE8_BARGA | AYKDAIGVWTIGYGHT  |
| tr | Q6G209 | Q6G209_BARHE | AYQDSIGVWTIGYGHT  |
| tr | Q6FYR6 | Q6FYR6_BARQU | AYQDAVGLWTIGYGHT  |
| tr | C6AD78 | C6AD78_BARGA | AYRDTACVWTIGYGHT  |
| tr | C6ABV0 | C6ABV0_BARGA | AYRDTACVWTIGYGHT  |
| tr | A9ITY9 | A9ITY9_BART1 | AYRDTACIWTIGYGHT  |
| tr | A9IY31 | A9IY31_BART1 | AYRDTACIWTIGYGHT  |
| tr | Q6G365 | Q6G365_BARHE | AYRDASGVWTIGYGHT  |
| tr | C6ADN3 | C6ADN3_BARGA | AYQDTSGVWTIGYGHT  |
| tr | A9IN99 | A9IN99_BART1 | AYEDSGGIWTIGYGHT  |
| tr | C6ABT0 | C6ABT0_BARGA | AYEYSGGVWTIGYGHT  |
| tr | A1URH0 | A1URH0_BARBK | AYQDAVGIWTIGYGHT  |

|    |        |              |                   |
|----|--------|--------------|-------------------|
| tr | Q7P041 | Q7P041_CHRVO | AYQDMVGVWTIGYGHT  |
| tr | Q8PNJ6 | Q8PNJ6_XANAC | SYVCPAGKLTIGYGHT  |
| tr | C8CLH9 | C8CLH9_9CAUD | PYKDIVGVWTVCYGHT  |
| tr | D2U1M6 | D2U1M6_9ENTR | PYKDGGGVLTVCYGHT  |
| tr | Q1RHJ8 | Q1RHJ8_RICBR | PYYCPAGLKTIGYGHV  |
| tr | A8GV89 | A8GV89_RICB8 | PYYCPAGLKTIGYGHV  |
| tr | Q2N9G4 | Q2N9G4_ERYLH | VYRDVAGYPTVGVGHL  |
| tr | A3WB87 | A3WB87_9SPHN | VYRDVAGYPTVGVGHL  |
| tr | A5P716 | A5P716_9SPHN | VYRDVAGYPTVGVGHL  |
| tr | C3L4H1 | C3L4H1_AMOA5 | VYKDVAGIETIGYGHV  |
| tr | C5AG15 | C5AG15_BURGB | YYNDSKGYCTVGVGHL  |
| tr | B2JV34 | B2JV34_BURP8 | YYDDSKGYCTVGVGHL  |
| tr | A9MN07 | A9MN07_SALAR | AYNDSSEGYCTIGYGHL |
| tr | Q8ZLC6 | Q8ZLC6_SALTY | KYDRDQGNWVIGYGHM  |
| tr | Q5PJR8 | Q5PJR8_SALPA | KYDRDQGNWVIGYGHM  |
| tr | D0ZKG2 | D0ZKG2_SALT1 | KYDRDQGNWVIGYGHM  |
| tr | B5RGS1 | B5RGS1_SALG2 | KYDRDQGNWVIGYGHM  |
| tr | B5R406 | B5R406_SALEP | KYDRDQGNWVIGYGHM  |
| tr | B5FKM6 | B5FKM6_SALDC | KYDRDQGNWVIGYGHM  |
| tr | B5BHQ0 | B5BHQ0_SALPK | KYDRDQGNWVIGYGHM  |
| tr | B4T8E1 | B4T8E1_SALHS | KYDRDQGNWVIGYGHM  |
| tr | B4SWF3 | B4SWF3_SALNS | KYDRDQGNWVIGYGHM  |
| tr | C9X727 | C9X727_SALTD | KYDRDQGNWVIGYGHM  |
| tr | B5P1B9 | B5P1B9_SALET | KYDRDQGNWVIGYGHM  |
| tr | B5MX04 | B5MX04_SALET | KYDRDQGNWVIGYGHM  |
| tr | B5C3G2 | B5C3G2_SALET | KYDRDQGNWVIGYGHM  |
| tr | Q57IL7 | Q57IL7_SALCH | KYDRDQGNWVIGYGHM  |
| tr | Q8Z279 | Q8Z279_SALTI | KYDRDQGNWVIGYGHM  |
| tr | C0Q164 | C0Q164_SALPC | KYDRDQGNWVIGYGHM  |
| tr | B4TZ04 | B4TZ04_SALSV | KYDRDQGNWVIGYGHM  |
| tr | B5Q7E2 | B5Q7E2_SALVI | KYDRDQGNWVIGYGHM  |
| tr | B5PC54 | B5PC54_SALET | KYDRDQGNWVIGYGHM  |
| tr | B5C9I7 | B5C9I7_SALET | KYDRDQGNWVIGYGHM  |
| tr | B5F9H2 | B5F9H2_SALA4 | KYDRDQGNWVIGYGHM  |
| tr | A9MUN0 | A9MUN0_SALPB | KYDRDQGNWVIGYGHM  |
| tr | B5PRV6 | B5PRV6_SALHA | KYDRDQGNWVIGYGHM  |
| tr | B5NSD2 | B5NSD2_SALET | KYDRDQGNWVIGYGHM  |
| tr | B5ND52 | B5ND52_SALET | KYDRDQGNWVIGYGHM  |
| tr | B4A5H0 | B4A5H0_SALNE | KYDRDQGNWVIGYGHM  |
| tr | B3YCV0 | B3YCV0_SALET | KYDRDQGNWVIGYGHM  |
| tr | B5MHG3 | B5MHG3_SALET | KYDRDQGNWVIGYGHM  |
