# Supplementary material for: Structural Relationships in the Lysozyme Superfamily: Significant Evidence for Glycoside Hydrolase Signature Motifs
Source: PubMed Central journal article supplement (PMC2976769; doi:10.1371/journal.pone.0015388), 2010-11-09
Supplement: pone.0015388.s007.pdf [file pone.0015388.s007.pdf]

**Figure S6. Multiple alignment of GH24I motif sequences.**

|    |        |              | .... .... |
|----|--------|--------------|-----------|
| tr | O30554 | O30554_NEIGO | SDASGRYQF |
| tr | D1DW23 | D1DW23_NEIGO | SDASGRYQF |
| tr | D1DJA2 | D1DJA2_NEIGO | SDASGRYQF |
| tr | D1DCT5 | D1DCT5_NEIGO | SDASGRYQF |
| tr | Q5K692 | Q5K692_NEIGO | SDASGRYQF |
| tr | D1E2S1 | D1E2S1_NEIGO | SDASGRYQF |
| tr | D1EFJ4 | D1EFJ4_NEIGO | SDASGRYQF |
| tr | B9TBF9 | B9TBF9_RICCO | TTAAGMYQI |
| tr | D1TAW4 | D1TAW4_9BURK | TTAAGLYQI |
| tr | A2SGW7 | A2SGW7_METPP | SSAAGRYQL |
| tr | D1UM48 | D1UM48_9BURK | STAAGAYQF |
| tr | B2KJU8 | B2KJU8_BURPS | SSAAGAYQF |
| tr | Q0K1M1 | Q0K1M1_RALEH | SSAAGAYQF |
| tr | A7FIU8 | A7FIU8_YERP3 | TSAAGRYQF |
| tr | C4SUV2 | C4SUV2_YERFR | TSAAGRYQF |
| tr | D2C286 | D2C286_DICD5 | TSAAGRYQF |
| tr | C5A0Z7 | C5A0Z7_ECOBW | STGAGRYQL |
| tr | C6ZCX1 | C6ZCX1_LAMBD | STGAGRYQL |
| tr | C5W1U5 | C5W1U5_ECOBB | STGAGRYQL |
| tr | C6EJG0 | C6EJG0_ECOBD | STGAGRYQL |
| tr | Q716B5 | Q716B5_BPSFV | STAAGRYQL |
| tr | B7UG35 | B7UG35_ECO27 | STAAGRYQL |
| tr | Q0T7S1 | Q0T7S1_SHIF8 | STAAGRYQL |
| tr | B3H979 | B3H979_ECOLX | STAAGRYQL |
| tr | C8UCS0 | C8UCS0_ECO1A | STAAGRYQL |
| tr | A5VW81 | A5VW81_9CAUD | STAAGRYQL |
| tr | A1ADL8 | A1ADL8_ECOK1 | STAAGRYQL |
| tr | Q1R938 | Q1R938_ECOUT | STAAGRYQL |
| tr | B7MGZ0 | B7MGZ0_ECO45 | STAAGRYQL |
| tr | Q9MCT2 | Q9MCT2_BPHK0 | STAAGRYQL |
| tr | D3GYY0 | D3GYY0_ECOLX | STAAGRYQL |
| tr | C6ZR65 | C6ZR65_9CAUD | STAAGRYQL |
| tr | B9UDJ1 | B9UDJ1_9CAUD | STAAGRYQL |
| tr | D2A7X6 | D2A7X6_SHIF2 | STAAGRYQL |
| tr | C8TV15 | C8TV15_ECO26 | STAAGRYQL |
| tr | C1HNI2 | C1HNI2_9ESCH | STAAGRYQL |
| tr | Q9MCN4 | Q9MCN4_BPHK7 | STAAGRYQL |
| tr | Q77IT9 | Q77IT9_BPHK6 | STAAGRYQL |
| tr | Q57SQ6 | Q57SQ6_SALCH | STAAGRYQL |
| tr | C0PZH3 | C0PZH3_SALPC | STAAGRYQL |
| tr | A7ZWN9 | A7ZWN9_ECOHS | STAAGRYQL |
| tr | B3BQ98 | B3BQ98_ECO57 | STAAGRYQL |
| tr | B3HV98 | B3HV98_ECOLX | STAAGRYQL |
| tr | B3WIU8 | B3WIU8_ECOLX | STAAGRYQL |
| tr | B3A9F3 | B3A9F3_ECO57 | STAAGRYQL |
| tr | B3AU10 | B3AU10_ECO57 | STAAGRYQL |
| tr | B2PPB9 | B2PPB9_ECO57 | STAAGRYQL |
| tr | B2NUN6 | B2NUN6_ECO57 | STAAGRYQL |
| tr | B2P6W5 | B2P6W5_ECO57 | STAAGRYQL |
| tr | B3B464 | B3B464_ECO57 | STAAGRYQL |
| tr | B3BIH7 | B3BIH7_ECO57 | STAAGRYQL |
| tr | B3BZ35 | B3BZ35_ECO57 | STAAGRYQL |
| tr | B6ZZG5 | B6ZZG5_ECO57 | STAAGRYQL |
| tr | B5YXF1 | B5YXF1_ECO5E | STAAGRYQL |
| tr | C6URV2 | C6URV2_ECO5T | STAAGRYQL |
| tr | Q8X705 | Q8X705_ECO57 | STAAGRYQL |
| tr | C1HJG8 | C1HJG8_9ESCH | STAAGRYQL |
| tr | B7MJP3 | B7MJP3_ECO45 | STAAGRYQL |
| tr | A1AEH9 | A1AEH9_ECOK1 | STAAGRYQL |
| tr | Q1R868 | Q1R868_ECOUT | STAAGRYQL |
| tr | C8U911 | C8U911_ECO10 | STAAGRYQL |
| tr | B7M8F2 | B7M8F2_ECO8A | STAAGRYQL |
| tr | B3HTJ2 | B3HTJ2_ECOLX | STAAGRYQL |
| tr | B2N2G4 | B2N2G4_ECOLX | STAAGRYQL |
| tr | B3WTB5 | B3WTB5_ECOLX | STAAGRYQL |
| tr | Q8Z617 | Q8Z617_SALTI | STAAGRYQL |
| tr | B7NA40 | B7NA40_ECOLU | STAAGRYQL |
| tr | Q8SBE0 | Q8SBE0_BPSF5 | STAAGRYQL |
| tr | B5FL63 | B5FL63_SALDC | STAAGRYQL |
| tr | B7LJL2 | B7LJL2_ESCF3 | STAAGRYQL |
| tr | B3I771 | B3I771_ECOLX | STAAGRYQL |
| tr | B2U3U2 | B2U3U2_SHIB3 | STAAGRYQL |
| tr | B5XR49 | B5XR49_KLEP3 | STAAGRYQL |

|    |        |              |           |
|----|--------|--------------|-----------|
| tr | B1GS82 | B1GS82_9CAUD | STAAGRYQV |
| tr | B3RGM4 | B3RGM4_9CAUD | SSAAGRYQV |
| tr | B2FRB3 | B2FRB3_STRMK | SSAAGRYQF |
| tr | B4SMC4 | B4SMC4_STRM5 | SSAAGRYQF |
| tr | B8KZT2 | B8KZT2_9GAMM | SSAAGRYQF |
| tr | Q88G71 | Q88G71_PSEPK | SSAAGRYQF |
| tr | Q0BEL5 | Q0BEL5_BURCM | STAAGRYQI |
| tr | Q6J1Q5 | Q6J1Q5_9CAUD | STAAGRYQI |
| tr | A4LDY2 | A4LDY2_BURPS | STAAGRYQI |
| tr | A4JDH1 | A4JDH1_BURVG | STAAGRYQL |
| tr | Q9MC90 | Q9MC90_BPD3  | STAAGRYQL |
| tr | B5S318 | B5S318_RALSO | STAAGRYQL |
| tr | Q8XYQ8 | Q8XYQ8_RALSO | STAAGRYQL |
| tr | B4SNI7 | B4SNI7_STRM5 | STGAGRYQL |
| tr | B5PLH9 | B5PLH9_SALET | STASGRYQQ |
| tr | C9XHB2 | C9XHB2_SALTD | STASGRYQQ |
| tr | B5MYZ0 | B5MYZ0_SALET | STASGRYQQ |
| tr | Q6K1I1 | Q6K1I1_9CAUD | STASGRYQQ |
| tr | B5MU90 | B5MU90_SALET | STASGRYQQ |
| tr | O80309 | O80309_BP186 | STASGRYQQ |
| tr | C6V0R3 | C6V0R3_ECO5T | STASGRYQQ |
| tr | B7MEC0 | B7MEC0_ECO45 | STASGRYQQ |
| tr | B5YUG0 | B5YUG0_ECO5E | STASGRYQQ |
| tr | A1A9F8 | A1A9F8_ECOK1 | STASGRYQQ |
| tr | C1NGQ4 | C1NGQ4_9ESCH | STASGRYQQ |
| tr | B3BVK4 | B3BVK4_ECO57 | STASGRYQQ |
| tr | B3AVQ9 | B3AVQ9_ECO57 | STASGRYQQ |
| tr | B3A901 | B3A901_ECO57 | STASGRYQQ |
| tr | Q76ZD6 | Q76ZD6_9CAUD | STASGRYQQ |
| tr | B1EPP6 | B1EPP6_9ESCH | STASGRYQQ |
| tr | B2N3V9 | B2N3V9_ECOLX | STASGRYQQ |
| tr | B2PP35 | B2PP35_ECO57 | STASGRYQQ |
| tr | B2PD69 | B2PD69_ECO57 | STASGRYQQ |
| tr | B2NUI4 | B2NUI4_ECO57 | STASGRYQQ |
| tr | Q7Y4E4 | Q7Y4E4_BPP2  | STASGRYQQ |
| tr | B3BLU1 | B3BLU1_ECO57 | STASGRYQQ |
| tr | B1LMX9 | B1LMX9_ECOSM | STASGRYQQ |
| tr | A6TE68 | A6TE68_KLEP7 | STASGRYQQ |
| tr | C6CF31 | C6CF31_DICZE | STAAGRYQQ |
| tr | D2BWX0 | D2BWX0_DICD5 | STAAGRYQQ |
| tr | C6C704 | C6C704_DICDC | STAAGRYQQ |
| tr | B8L8I5 | B8L8I5_9GAMM | SNASGRYQF |
| tr | B8L9S2 | B8L9S2_9GAMM | SNASGRYQF |
| tr | Q46YK5 | Q46YK5_RALEJ | SNAAGRYQH |
| tr | Q6UYK3 | Q6UYK3_9CAUD | STASGRYQQ |
| tr | A4SL92 | A4SL92_AERS4 | STAAGRYQF |
| tr | A5X9I5 | A5X9I5_9CAUD | STAAGRYQF |
| tr | B0JGM5 | B0JGM5_MICAN | STAAGRYQF |
| tr | C4U050 | C4U050_YERKR | SSAAGAYQV |
| tr | B4E744 | B4E744_BURCJ | SSAAGAYQI |
| tr | B8HW77 | B8HW77_CYAP4 | TTAAGRYQF |
| tr | Q8DK42 | Q8DK42_THEEB | TTAAGRYQF |
| tr | B0CAN4 | B0CAN4_ACAM1 | TTAAGRYQF |
| tr | B7KAY2 | B7KAY2_CYAP7 | TTAAGRYQF |
| tr | B4B7H5 | B4B7H5_9CHRO | STAAGRYQF |
| tr | B4VYB5 | B4VYB5_9CYAN | TTAAGRYQF |
| tr | Q3M520 | Q3M520_ANAVT | STAAGRYQI |
| tr | Q8YTG5 | Q8YTG5_ANASP | STAAGRYQI |
| tr | A0ZIR9 | A0ZIR9_NODSP | STAAGRYQI |
| tr | B2J3F8 | B2J3F8_NOSP7 | STAAGRYQI |
| tr | P74105 | P74105_SYNY3 | STASGRYQF |
| tr | B5W3E0 | B5W3E0_SPIMA | TTAAGRYQF |
| tr | Q117E2 | Q117E2_TRIEI | STAAGRYQM |
| tr | B4WPE7 | B4WPE7_9SYNE | TTAAGRYQF |
| tr | A3IRW1 | A3IRW1_9CHRO | STAAGRYQF |
| tr | B1WYC8 | B1WYC8_CYAA5 | STAAGRYQF |
| tr | B7JUQ2 | B7JUQ2_CYAP8 | STAAGRYQF |
| tr | Q55936 | Q55936_SYNY3 | STAAGRYQF |
| tr | A0YIW4 | A0YIW4_9CYAN | TTAAGRYQL |
| tr | A4CXH0 | A4CXH0_SYNPV | SAAAGAYQL |
| tr | A5GJU0 | A5GJU0_SYNPW | SAAAGAYQF |
| tr | A3Z536 | A3Z536_9SYNE | SAAAGAYQF |
| tr | Q05R76 | Q05R76_9SYNE | SAAAGAYQF |
| tr | Q0I904 | Q0I904_SYNS3 | SAAAGAYQF |
| tr | Q7V8D3 | Q7V8D3_PROMM | SAAAGAYQF |
| tr | A2CAU6 | A2CAU6_PROM3 | SAAAGAYQF |
| tr | Q3AYC4 | Q3AYC4_SYNS9 | SAAAGAYQF |

|    |        |              |           |
|----|--------|--------------|-----------|
| tr | Q065Z3 | Q065Z3_9SYNE | SAAAGAYQF |
| tr | D0CI57 | D0CI57_9SYNE | SAAAGAYQF |
| tr | Q3AKT8 | Q3AKT8_SYNSC | SAAAGAYQF |
| tr | Q7U664 | Q7U664_SYNPX | SAAAGAYQF |
| tr | Q3AY16 | Q3AY16_SYNS9 | SAAAGAYQF |
| tr | Q067I0 | Q067I0_9SYNE | SAAAGAYQF |
| tr | D0CJC1 | D0CJC1_9SYNE | SAAAGAYQF |
| tr | Q3AJM5 | Q3AJM5_SYNSC | SAAAGAYQF |
| tr | Q7U6M5 | Q7U6M5_SYNPX | SAAAGAYQF |
| tr | Q7V7S4 | Q7V7S4_PROMM | SAAAGAYQF |
| tr | A2C9Z4 | A2C9Z4_PROM3 | SAAAGAYQF |
| tr | A5GL12 | A5GL12_SYNPW | SAAAGAYQF |
| tr | A4CUP6 | A4CUP6_SYNPV | SAAAGAYQF |
| tr | Q0IA84 | Q0IA84_SYNS3 | SAAAGAYQF |
| tr | A3Z6Z0 | A3Z6Z0_9SYNE | SAAAGAYQF |
| tr | Q05T44 | Q05T44_9SYNE | SAAAGAYQF |
| tr | A3Z1Y9 | A3Z1Y9_9SYNE | SAAAGAYQF |
| tr | B5IJ50 | B5IJ50_9CHRO | SAAAGAYQF |
| tr | A5GTW9 | A5GTW9_SYNR3 | SAAAGAYQF |
| tr | B5IL03 | B5IL03_9CHRO | SAAAGAYQF |
| tr | A3Z1B0 | A3Z1B0_9SYNE | SAAAGAYQM |
| tr | A5GTZ0 | A5GTZ0_SYNR3 | SAAAGAYQF |
| tr | Q8ZS41 | Q8ZS41_ANASP | STAAGAYQM |
| tr | Q3M149 | Q3M149_ANAVT | STAAGAYQM |
| tr | Q10XQ1 | Q10XQ1_TRIEI | SDAAGRYQF |
