# Supplementary material for: Structural Relationships in the Lysozyme Superfamily: Significant Evidence for Glycoside Hydrolase Signature Motifs
Source: PubMed Central journal article supplement (PMC2976769; doi:10.1371/journal.pone.0015388), 2010-11-09
Supplement: pone.0015388.s008.pdf [file pone.0015388.s008.pdf]

Figure S7. Multiple alignment of GH46 motif sequences.

|    |        |              |                     |
|----|--------|--------------|---------------------|
|    |        |              | 10                  |
|    |        |              | ... ... ... ..      |
| tr | D1XP65 | D1XP65_9ACTO | DGRGYTAGIIGFCSGTG   |
| tr | C9NEY0 | C9NEY0_9ACTO | DGRGYTAGIIGFCSGTG   |
| tr | Q82LJ5 | Q82LJ5_STRAW | DGRGYTAGIIGFCSGTG   |
| tr | Q9RJ88 | Q9RJ88_STRCO | DGRGYTAGIIGFCSGTG   |
| tr | C9E0E7 | C9E0E7_STRLI | DGRGYTAGIIGFCSGTG   |
| tr | A0AD68 | A0AD68_STRAM | DGRGYTAGIIGFCSGTG   |
| tr | B4VD22 | B4VD22_9ACTO | DQRGYTAGIIGFCSGTG   |
| tr | B1Q2K4 | B1Q2K4_9ACTO | DGRGYTGGIIGFCSGTH   |
| tr | B5GIH8 | B5GIH8_9ACTO | DGRGYTAGIIGFCSGTG   |
| tr | D2AW85 | D2AW85_STRRD | DGRGYTAGIIGFCSGTG   |
| tr | B5GRN3 | B5GRN3_STRCL | DGRGYTAGVAGFCSGTG   |
| tr | B5HRQ8 | B5HRQ8_9ACTO | DGRGYTAGIIGFCSGTS   |
| tr | C6WIU3 | C6WIU3_ACTMD | DGRGYTAGIIGFCSGTG   |
| tr | Q9LBG4 | Q9LBG4_9PSEU | DGRGYTAGIIGFCSGTG   |
| tr | A9WUI6 | A9WUI6_RENSM | DDRGYTGGIIGFTSGTG   |
| tr | C2BY78 | C2BY78_LISGR | DGRGYTAGIIGFCSGTG   |
| tr | D3J1N7 | D3J1N7_9BURK | MG-GYTGGLIGFTSGTS   |
| tr | C9NEX9 | C9NEX9_9ACTO | DGRGYTAGIIGFCSGTG   |
| tr | D1XP66 | D1XP66_9ACTO | DGRGYTAGVIGFCSGTG   |
| tr | B5HFR3 | B5HFR3_STRPR | DGRGYTAGIIGFCSGTG   |
| tr | Q8KZM5 | Q8KZM5_9PSED | DGRGYTGGLIGFTSGTG   |
| tr | A7KBW5 | A7KBW5_9MICO | DGRGYTGGLIGFTSGTG   |
| tr | Q7WT07 | Q7WT07_9ACTO | DGRGYTAGIIGFCSGTG   |
| tr | D1XSH1 | D1XSH1_9ACTO | DNGYTAGIVGFCSGTN    |
| tr | B5H4T0 | B5H4T0_STRPR | DNGYTAGIIGFCSGTN    |
| tr | Q82A68 | Q82A68_STRAW | DGRGYTAGVIGFCTGTH   |
| tr | A7Z8H9 | A7Z8H9_BACA2 | DGRGYTCGRAGFTTATG   |
| tr | A0EQW7 | A0EQW7_9BACI | DGRGYTCGRAGFTTATG   |
| tr | Q9ET84 | Q9ET84_BACAM | DGRGYTCGRAGFTTATG   |
| tr | B9W6G0 | B9W6G0_BACSU | DGRGYTCGRAGFTTATG   |
| tr | D0FHB6 | D0FHB6_BACSU | DGRGYTCGRAGFTTATG   |
| tr | Q0PVM7 | Q0PVM7_BACAM | DGRGYTCGRAGFTTATG   |
| tr | O24825 | O24825_9BACL | DERGYSIGLIFGATTGGP  |
| tr | Q2PWA1 | Q2PWA1_9BACL | DDRGYTIIVLFGATTGGS  |
| tr | Q7NR53 | Q7NR53_CHRVO | DKRGYTIIGLIFGATTGGP |
| tr | Q9XDS6 | Q9XDS6_BURGA | DDRGYTMGIFGATTGGP   |
| tr | Q7M0I1 | Q7M0I1_BACCO | DQPAYPFAIGGASADGG   |
| tr | Q8VU68 | Q8VU68_BACCO | GQPAYPFAIGGASADGG   |
| tr | A7RBE5 | A7RBE5_PBCVA | DGRGWTVTLYGACSGTG   |
| tr | A7IWR8 | A7IWR8_PBCVN | DGRGWTVTLYGACSGTG   |
| tr | Q84608 | Q84608_PBCV1 | DGRGWTVTIYGACSGTG   |
| tr | O12288 | O12288_9PHYC | DGRGWTVTIYGACSGTG   |
| tr | A7J6E1 | A7J6E1_PBCVF | DGRGWTVTIYGACSGTG   |
| tr | A7ITH1 | A7ITH1_PBCVM | DGRGWTVTIYGACSGTG   |
| tr | A7K8G4 | A7K8G4_9PHYC | DGRGWTVTLYGACSGTG   |
| tr | B2J4Y1 | B2J4Y1_NOSP7 | DGRGVTIIGIYGATTCKG  |
